1 Identification and characterization of *Gypsophila paniculata* color morphs in Sleeping Bear  
2 Dunes National Lakeshore, MI, USA.

3

4 Marisa L. Yang<sup>1</sup>, Emma Rice<sup>2</sup>, Hailee Leimbach-Maus<sup>2</sup>, and Charlyn G. Partridge<sup>2</sup>

5

6 <sup>1</sup>Environmental Science Policy, and Management, University of California, Berkeley, 260

7 Mulford Hall, Berkeley, CA 94720, email: marisayang79@gmail.com

8 <sup>2</sup>Annis Water Resources Institute, 740 W. Shoreline Dr., Muskegon, MI 49441, email:

9 riceemm@mail.gvsu.edu; hailee.pavisich@gmail.com

10

11 Corresponding author: Charlyn Partridge, Annis Water Resources Institute, Grand Valley State

12 University, 740 W. Shoreline Dr., Muskegon, MI; 49441, email: partridc@gvsu.edu

13

## 14 **Abstract**

### 15 **Background.**

16 *Gypsophila paniculata* (baby's breath) is an invasive species found throughout much of the

17 northwest United States and western Canada. Recently, plants exhibiting a different color

18 morphology were identified within the coastal dunes along eastern Lake Michigan. The common

19 baby's breath (*G. paniculata*) typically produces stems that are purple in color (purple morph),

20 while the atypical morph has stems that are green-yellow (green-yellow morph). The purpose of

21 this study was to characterize these newly identified morphs and determine if they are genetically

22 distinct species from the common baby's breath in order to assess whether alternative

23 management strategies should be employed to control these populations.

24

25 **Methods.** We sequenced two chloroplast regions, *rbcL* and *matK*, and one nuclear region, ITS2,  
26 from the purple morphs and green-yellow morphs collected from Sleeping Bear Dunes National  
27 Lakeshore, MI, USA (SBDNL). Sequences were aligned to the reference sequences from other  
28 *Gypsophila* species obtained from the Barcode of Life (BOLD) and GenBank databases. We also  
29 collected seeds from wild purple morph and wild green-yellow morph plants in SBDNL. We  
30 grew the seeds in a common garden setting and characterized the proportion of green-yellow  
31 individuals produced from the two color morphs after five-months of growth.

32

33 **Results.** Phylogenetic analyses based upon *rbcL*, *matK*, and ITS2 regions suggest that the two  
34 color morphs are not distinct species and they both belong to *G. paniculata*. Seeds collected from  
35 wild green-yellow morphs produced a significantly higher proportion of green-yellow  
36 individuals compared to the number produced by seeds collected from wild purple morphs.  
37 However, seeds collected from both color morphs produced more purple morphs than green-  
38 yellow morphs.

39

40 **Discussion.** Based upon these results, we propose that the two color morphs are variants of *G.*  
41 *paniculata*. Given the significant difference in the number of green-yellow morphs produced  
42 from the seeds of each morph type, we also suggest that this color difference has some genetic  
43 basis. We propose that current management continue to treat the two color morphs in a similar  
44 manner in terms of removal to prevent the further spread of this species.

45

46

## 47 **Introduction**

48           The Great Lakes sand dunes comprise the most extensive freshwater dune complex in the  
49 world, stretching over 1,000 km<sup>2</sup> in Michigan alone. Within northwest Michigan, the sand dunes  
50 ecosystem is vital both environmentally and economically. It is home to a number of threatened  
51 and endangered species, including piping plover (*Charadrius melodus*) and Pitcher's thistle  
52 (*Cirsium pitcheri*). Colonization of invasive species in this region has the potential to  
53 significantly alter the biological composition of these native communities (Leege and Murphy,  
54 2001; Emery et al. 2013). One invasive species of significant concern is the perennial baby's  
55 breath (*Gypsophila paniculata*). In 2015, baby's breath was listed by the Michigan Department  
56 of Natural Resources (DNR) as a "priority" invasive species for detection and control in  
57 Michigan's northern lower peninsula (DNR, 2015). Since its colonization in the region it has  
58 spread along a 260 km stretch of the Michigan shoreline. Baby's breath produces a large taproot  
59 system that can extend down to 4 meters in depth, which likely helps it outcompete native  
60 vegetation for limited resources (Darwent & Coupland, 1966; Karamanski, 2000). In addition,  
61 while many of the vulnerable and endangered plant species in these areas are seed limited, (e.g.,  
62 Pitcher's thistle produces approximately 50-300 seeds per plant total or 'per lifetime' (Bevill et  
63 al., 1999)), baby's breath can produce up to 14,000 seeds per plant annually (Stevens, 1957),  
64 effectively outcompeting native species in terms of overall yield. This has led to baby's breath  
65 composing approximately 50-80% of the ground cover in some areas (Karamanski, 2000; Emery  
66 et al., 2013).

67           One concern with current management efforts is that anecdotal evidence suggests there  
68 may be a new baby's breath variant within the Michigan dune system. In 2011 and 2012 The  
69 Nature Conservancy (TNC) removal crews reported baby's breath plants with different character

70 traits than what is commonly observed (TNC, 2014). The atypical morph has stems and leaves  
71 that are lighter in color and more yellow than the common *G. paniculata* purple morph (Figure  
72 1a-c). The purple morph has a thick taproot (4-7 cm in diameter) just below the caudex that  
73 remains unbranched for approximately 60 – 100 cm (Darwent & Coupland, 1966). Severing just  
74 below the intersection of the caudex and the taproot is where manual removal efforts target to  
75 limit regrowth. However, TNC removal crews suggested that the atypical green-yellow morph's  
76 root system seemed to be more diffuse, making it harder to identify a primary taproot and thus,  
77 harder to sever without the potential for regrowth (TNC, 2014). Currently, these green-yellow  
78 morphs are treated with herbicide application (glyphosate) when observed; however, if this is a  
79 newly invaded baby's breath species and it continues to spread into areas where threatened or  
80 endangered species are present, removal methods will be a primary concern and alternative  
81 management strategies may need to be considered for these populations.

82         One of the first steps toward adapting current management strategies for this invasive is  
83 to identify whether the green-yellow morph is a genetically distinct species from the purple  
84 morph. While *G. paniculata* is the dominant invasive baby's breath species in northwest  
85 Michigan, a number of other species have been introduced to North America and, specifically,  
86 the Great Lakes region (Pringle, 1976, Voss & Reznicek, 2012). For example, *G. elegans*, *G.*  
87 *scorzonerifolia*, *G. muralis*, and *G. acutifolia* have been collected within Michigan (Pringle,  
88 1976; Reznicek et al., 2011; Voss & Reznicek, 2012), and *G. perfoliata* is reported to have  
89 become naturalized in the United States (Pringle, 1976). *G. muralis* is an annual and has a very  
90 distinct morphology compared to the other *Gypsophila* species identified around the Great  
91 Lakes. It typically only reaches 5-20 cm in height, has linear leaves, and commonly produces  
92 white to pink flowers (Borkaudah, 1962). *G. elegans*, also an annual, is commonly sold in this

93 region in commercial wildflower packets. It typically has a smaller taproot compared to *G.*  
94 *paniculata*, and its coloration can be similar to that observed for the green-yellow morph. *G.*  
95 *scorzonerifolia* and *G. acutifolia* are perennials and specimens of these species have been  
96 collected in counties within the Great Lakes dune system that also contain *G. paniculata*  
97 infestations (Voss, 1957; Pringle, 1976). Both *G. scorzonerifolia* and *G. acutifolia* have a deep  
98 taproot and are similar in height to *G. paniculata*, and thus, can superficially resemble *G.*  
99 *paniculata* (Voss, 1957; Pringle, 1976). However, both can be distinguished from *G. paniculata*  
100 in that their leaves tend to be longer and wider, and the pedicels and calyces are glandular as  
101 opposed to glabrous in *G. paniculata* (Voss, 1957; Pringle, 1976). Given the potential for these  
102 other species to invade the fragile habitat of the Michigan dune system, the goal of this work was  
103 to characterize the genetic relationship between the newly recognized green-yellow morph and  
104 the common purple morph to determine if they are the same species.

105

## 106 **Methods and materials**

### 107 *DNA Extraction, Amplification, and Sequencing*

108 We collected leaf tissue from 1 green-yellow morph and 16 purple morphs in 2016 and  
109 an additional 15 green-yellow morphs in 2017 from Sleeping Bear Dunes National Lakeshore  
110 (SBDNL), Empire, MI, USA (specifically: 44.884941 N, 86.062111 W and 44.875302 N,  
111 86.056821 W). Plant tissue collections were approved by the National Parks Service (permit ID  
112 SLBE-2015-SCI-0013). Leaf tissue was dried in silica gel until DNA extractions could take  
113 place. DNA was extracted using a Qiagen DNeasy Plant Mini Kit (Qiagen, Hilden, Germany).  
114 After extraction, the DNA samples were placed through Zymo OneStep PCR inhibitor removal  
115 columns (Zymo, Irvine, CA) to remove any secondary metabolites that might inhibit PCR

116 amplification. The DNA for each sample was then quantified using a NanoDrop 2000  
117 (ThermoFisher, Waltham, MA).

118 The DNA of green-yellow morphs and purple morphs was amplified at three genetic  
119 regions: large subunit of the ribulose-bisphosphate carboxylase gene (*rbcL*), maturase K (*matK*),  
120 and internal transcribed spacer 2 (*ITS2*). A combination of *ITS* region and *matK* have been used  
121 to differentiate between other *Gypsophila* species (specifically, *G. elegans* and *G. repens*) in  
122 previous studies (Fior et al., 2006). The *rbcL* region was amplified using *rbcL* 1F and *rbcL* 724R  
123 primers (Fay et al., 1997), *matK* was amplified using *matK* 390F and *matK* 1440R primers (Fior  
124 et al., 2006), and the *ITS2* region was amplified using *ITS2* 2SF and *ITS2* S3R primers (Chen et  
125 al., 2010). PCR reactions for all loci consisted of 1X Taq Buffer, 2.0 mM MgCl<sub>2</sub>, 0.3 μM dNTP,  
126 0.08 mg/mL BSA, 0.4 μM forward primer, 0.4 μM reverse primer, and 0.5 units of Taq  
127 polymerase in a 20 μL reaction volume. The thermal cycle protocols consisted of the following:  
128 for *rbcL*, an initial denaturing step of 95°C for 2 minutes, followed by 35 cycles of 94°C for 1  
129 minute, 55°C for 30 seconds, and 72°C for 1 minute. A final elongation step was performed at  
130 72°C for 7 minutes. For *matK*, the thermal profile consisted of 26 cycles of 94°C for 1 minute,  
131 48°C for 30 seconds, and 72°C for 1 minute, followed by a final elongation step at 72°C for 7  
132 minutes. For *ITS2*, an initial denaturing step of 95°C for 2 minutes was applied, followed by 35  
133 cycles of 95°C for 30 seconds, 50°C for 30 seconds, 72°C for 1.5 minutes, and a final elongation  
134 step of 72°C for 8 minutes. Successful amplification was checked by running the PCR product on  
135 a 2% agarose gel stained with ethidium bromide. PCR reactions were then cleaned using  
136 ExoSAP-IT PCR Product Cleanup Reagent (ThermoFisher, Waltham, MA). Sequencing  
137 reactions were performed with the forward and reverse primers for each of the three regions.  
138 Sequencing reactions were cleaned using a Sephadex column (GE Healthcare Life Science,

139 Marlborough, MA) and sequenced on an ABI Genetic BioAnalyzer 3130xl (Applied Biosystems,  
140 Foster City, CA). Out of the 16 green-yellow morphs a total of 13 were successfully sequenced  
141 for *rbcL*, 13 were successfully sequenced for *matK*, and 14 were successfully sequenced for  
142 ITS2. For the purple morphs a total of 15, 12, and 15 individuals were successfully sequenced  
143 for *rbcL*, *matK* and ITS2, respectively.

144 Reference sequences for *rbcL*, *matK*, and ITS2 of other *Gypsophila spp.* were  
145 downloaded from either the Barcode of Life Database (BOLD) (<http://www.barcodeoflife.org>) or  
146 GenBank (<https://www.ncbi.nlm.nih.gov/genbank/>). We primarily focused on *Gypsophila*  
147 species with reported occurrences within the United States, but also incorporated other species if  
148 their information was available on BOLD. Sequences of the three regions were not always  
149 available for the same species, thus for *rbcL* these included *G. paniculata*, *G. elegans*, *G.*  
150 *fastigiata*, *G. scorzonerifolia*, *G. perfoliata*, and *G. muralis*. For *matK* the species included *G.*  
151 *paniculata*, *G. elegans*, *G. fastigiata*, *G. scorzonerifolia*, *G. perfoliata*, *G. muralis*, *G. altissima*,  
152 and *G. repens*. For the IST2 region, the species included *G. paniculata*, *G. elegans*, *G.*  
153 *scorzonerifolia*, *G. perfoliata*, *G. repens*, and *G. acutifolia*. Because sequences for all three  
154 regions were not available for all species, our merged phylogeny only contained *G. paniculata*,  
155 *G. elegans*, *G. scorzonerifolia*, and *G. perfoliata* reference sequences. The accession numbers  
156 and sequences for all reference species are provided in Supplemental Table 1. All FASTA files  
157 corresponding to these data will be deposited in the Dryad database and sequences have been  
158 submitted to GenBank (ITS2: MG385003-385031, *matK*: MG603322-603346, *rbcL*:  
159 MG547346-547373).

160

161

162 *Alignment and Phylogenetic Analysis*

163 All successful sequences from our field samples, as well as sequences for other  
164 *Gyposphila* species reference sequences obtained from BOLD or GenBank, were imported into  
165 the program MEGA7 (version 7.0.14) (Kumar et al., 2016) and sequences for each of the three  
166 regions were aligned both individually and with all sequences combined using Muscle (Edgar,  
167 2004). The total number of base pairs aligned and analyzed for each region included: 427 base  
168 pair (bp) for rbcL, 702 bp for matK, 201 bp for ITS2, and 1330 bp for the three regions  
169 combined. All alignment parameters were kept at their default settings. Once aligned, we used  
170 MEGA7 to identify the most appropriate substitution model (rbcL: Jukes-Cantor, matK: Tamura  
171 3-parameter, ITS2: Jukes-Cantor, all genes combined: Tamura 3-parameter with gamma  
172 distribution). We then created phylogenetic trees using a maximum-likelihood (ML) approach  
173 with 500-replicated bootstrap analyses, as well as using neighbor joining, and parsimony models.  
174 We also constructed a TCS haplotype network (Clement et al., 2002) based upon the combined  
175 sequences using the statistical parsimony approach (Templeton et al., 1992) in the program  
176 PopART (v 1.7, <http://popart.tago.ac.nz>).

177

178 *Color Morph Germination*

179 On May 8, 2018 we planted a total of 207 seeds collected from mature purple morphs  
180 and 255 seeds collected from mature green-yellow morphs from SBDNL. For the purple morph  
181 seeds, these were collected from a total of 14 plants that were sampled in 2016 (average 15 seeds  
182 per plant) and 7 plants that were sampled in 2017 (average 1.7 seeds per plant). For the green-  
183 yellow morphs, these seeds were collected from a total of 17 plants (15 seeds per plant) in 2017.  
184 Plants were grown in the GVSU – Allendale greenhouse from May until August, 2018. The



185 greenhouse was on a 17 hour light/ 7 hour dark cycle. The average day temperature was 21°C  
186 and night temperature was 15 °C. In August the plants were transported to the greenhouse at  
187 AWRI-GVSU where they were allowed to grow until October 15, 2018. The greenhouse at  
188 AWRI-GVSU has no external lighting source or temperature controls, and thus more closely  
189 resembled seasonal day/night and temperature cycles. Plants were sampled after a decrease in  
190 temperature occurred (from a high of 23 °C on October 10, 2018 to a high of 11 °C on October  
191 15, 2018). Previous greenhouse observations have found that the differences between the purple  
192 and green-yellow morphs can be best detected after a sudden drop in temperature (personal  
193 observation, CGP). On October 15, we characterized the color of all individuals that successfully  
194 germinated and survived over the 5-month period. We used a chi-square analysis in the R  
195 statistical package (v3.5.1) to determine if germination success differed between seeds from the  
196 two color morphs and whether the proportion of seeds that developed into green-yellow morphs  
197 significantly differed between seeds collected from mature purple and mature green-yellow  
198 plants.

## 199 **Results**

200 Our results indicate that the green-yellow morph identified in SBDNL is not a genetically  
201 distinct species from the common purple found throughout SBDNL. The *rbcL*, *matK*, *ITS2*, and  
202 combined dataset showed similar patterns with both the green-yellow morphs and the purple  
203 morphs clustering together. The phylogenies constructed from *rbcL* and *matK* independently  
204 show that the two color morphs cluster separately from *G. fastigata*, *G. elegans*, *G. muralis*, and  
205 *G. repens*. For the *rbcL* locus, the relationship of the color morphs to *G. paniculata* and *G.*  
206 *scorzonerifolia* was not resolved. Additionally, when we only examined the *matK* gene, the color  
207 morphs clustered separately but within a clade that also included *G. altissima*, *G. scorzonerifolia*,

208 and *G. paniculata*. The ITS2 region was able to provide more resolution between *G. paniculata*,  
209 *G. scorzonerifolia*, *G. acutifolia*, and the color morphs, with the color morphs clustering with *G.*  
210 *paniculata* (Figure 2a-d; Supplemental Figure 1-8) and separately from the *G. scorzonerifolia*  
211 and *G. acutifolia* clade. The same pattern was observed when all regions were analyzed together  
212 (Figure 2d), with the exception that this phylogeny did not include *G. acutifolia*. In addition, the  
213 TCS haplotype network shows that the purple and green-yellow morphs have shared haplotypes.  
214 These two haplotypes are only one mutation away from one another and the *G. paniculata*  
215 reference, while the next closest species, *G. scorzonerifolia* is 15 mutations away (Figure 3).  
216 This further suggests that both color morphs are *G. paniculata*.

217         Of the regions analyzed for the green-yellow morphs, purple morphs, and reference  
218 sequences, *rbcL* was the most conserved sequence with an overall mean genetic distance ( $d$ ) =  
219 0.004, followed by *matK* ( $d = 0.015$ ) and ITS2 ( $d = 0.038$ ). For the ITS2 region, there were six  
220 purple morphs and one green-yellow morph that clustered together inside the *G. paniculata*  
221 branch (Figure 2c & 2d). Further examination of the electropherograms for these individuals  
222 show that they are likely heterozygous at position 138 of our aligned sequence and amplification  
223 bias of the ‘A’ single nucleotide polymorphism (SNP) over the allele containing the ‘G’ SNP is  
224 driving this pattern.

225

### 226 *Color Morph Germination*

227         Out of the 207 seeds that were collected from mature purple morphs and planted in the  
228 greenhouse, 82 successfully germinated and survived over the 5 month period (39.6%). Out of  
229 these 82 plants, only one green-yellow morph was produced (1.2%), while the remaining seeds  
230 all produced purple morphs. Out of the 255 seeds collected from mature green-yellow morphs

231 and planted in the greenhouse, 105 successfully germinated and survived over the 5 month  
232 period (41.2%). This was not significantly different than the proportion of plants that  
233 successfully germinated from the purple morph seeds ( $\chi^2 = 0.06$ ,  $df = 1$ ,  $p = 0.81$ ). Of the 105  
234 successfully germinated seeds from the green-yellow morph plants, 12 developed into green-  
235 yellow morph plants (11.4%), 91 developed into purple morphs plants (86.7%), and two plants  
236 could not be determined (they appeared to be green-yellow morphs but displayed some dark  
237 spots on the stem). The proportion of seeds that produced green-yellow individuals significantly  
238 differed between seeds collected from mature green-yellow morphs and seeds collected from  
239 mature purple morphs ( $\chi^2 = 5.9$ ,  $df = 1$ ,  $p = 0.015$ ).

240

## 241 **Discussion**

242 Overall, our data suggest that the green-yellow morph is not a genetically distinct species  
243 from the purple morph, and that both morphs are *G. paniculata*. For all molecular markers used,  
244 the green-yellow and the purple color morphs grouped together. *RbcL*, *matK*, and *ITS2* are  
245 common ‘barcode’ genes used to delineate plant species (Newmaster et al., 2006; Group et al.,  
246 2009; Chen et al., 2010; Yao et al., 2010; Stoeckle et al., 2011) and when used in combination  
247 they provided adequate resolution to separate out the *Gypsophila* species included in this study.  
248 In our data set, *rbcL* and *matK* worked well to separate our color morphs from *G. elegans*, *G.*  
249 *muralis* and both of these species have been reported to occur in the Great Lakes region  
250 (Reznicek et al., 2011; Voss & Reznicek 2012). While the morphology of *G. muralis* is very  
251 distinct from the color morphs in SBDNL, it was initially thought that *G. elegans* shared some  
252 similar traits to that originally described by the TNC removal crews and was a potential

253 candidate species for the green-yellow color morph. Based upon these results, this is clearly not  
254 the case.

255 The phylogeny based on ITS2 region and the combined sequences provided the best  
256 resolution for assigning the relationship of our *Gypsophila* species. Like the *rbcL* and *matK*  
257 phylogenies, all the purple and green yellow morphs grouped together. For this region, the color  
258 morphs also grouped within the same clade as the *G. paniculata* reference sequence. While *G.*  
259 *scorzonerifolia* and *G. acutifolia* have also been recorded in the Great Lakes regions (Pringle,  
260 1976), and have a similar general phenotype as *G. paniculata*, these species were clearly within a  
261 distinct clade that was separate from the two color morphs. Similarly, while *G. perfoliata* has  
262 been reported to be naturalized in North America (Pringle, 1976), it grouped outside of the *G.*  
263 *paniculata* and color morph cluster.

264 Our greenhouse germination study showed that seeds collected from mature green-yellow  
265 morphs produced a significantly higher proportion of green-yellow individuals than seeds  
266 collected from mature purple morphs. Of the seeds collected from mature green-yellow morphs  
267 11% resulted in green-yellow morphs, while only 1% of seeds from mature purple morphs  
268 resulted in green-yellow morphs. However, seeds from both color morphs primarily produced  
269 purple morphs. The mechanism driving the color difference between the purple and green-  
270 morphs is currently unknown. Within SBDNL, the purple morph is the most common form, with  
271 green-yellow individuals found interspersed in a couple of locations throughout the dunes  
272 (personal observation, CGP/HLM/ER). The largest observed group of green-yellow morphs  
273 consists of a few hundred plants clumped within approximately an acre-sized area and  
274 interspersed throughout large groups of purple morphs. Based upon the dispersal patterns of the  
275 two morphs throughout the dunes, and our germination results, the color difference observed

276 does not appear to be solely environmentally driven, and likely has a genetic component.  
277 Potential candidate genes that could be influencing these color differences include those involved  
278 in the anthocyanin pathway, which influences red – purple coloration in a number of plants  
279 (Asen et al., 1972; de Pascual-Teresa et al., 2002; Abdel-Aal et al., 2006). In addition,  
280 anthocyanin can rapidly accumulate in the shoots of plants following cold exposure (Leng et al.,  
281 2000), and we have observed an increase in the amount of purple coloration in the purple morphs  
282 as temperatures decrease (personal observation, CGP). Further work will begin to elucidate the  
283 specific mechanism influencing this color difference in invasive *G. paniculata* populations, as  
284 well as to explore whether this color variation drives functional differences between the morphs.

285       Taken together, these data show that the purple and green-yellow morph within SBDNL  
286 are the same species, and that species is *G. paniculata*. One concern with the green-yellow  
287 morph initially noted by TNC removal crews was that the taproot tended to be more diffuse than  
288 the purple morph, potentially making manual removal of these plants less effective. However, we  
289 have not noted differences in the taproot structure between these two morphs when grown under  
290 controlled conditions (Figure 4). Additionally, our lab’s personal observations (CGP, HLM) in  
291 the field have not found any indication that large differences in root structure occur between  
292 mature plants of the two color morphs. Therefore, current management approaches for these  
293 populations should be maintained to control the further spread of *G. paniculata* throughout the  
294 Michigan coastal dune system.

295

## 296 **Conclusions**

297       Our data show that both the purple and green-yellow color morph of baby’s breath in  
298 Sleeping Bear Dunes National Lakeshore are *G. paniculata* and the observed color differences

299 likely have some genetic basis. Based on this current information, we recommend that these  
300 color morphs continue to be managed in a similar manner and that distinct management  
301 strategies do not need to be established at this time.

302

### 303 **Acknowledgements**

304 We would like to thank Shaun Howard from The Nature Conservancy for his help in identifying  
305 the green-yellow morph and Benjamin Giffin for his help with sequencing analysis. We would  
306 also like to thank Kurt Thompson and Doug Haywick for assisting with the figure construction,  
307 and Alexis Hoskins and Doug Haywick for helping with planting. Funding for this project was  
308 provided through an EPA-Great Lake Restoration Initiative Grant and an NSF- Research  
309 Experience for Undergraduates Grant.

310

### 311 **References**

- 312 Abdel-Aal ESM, Young JC, Rabalski I. 2006. Anthocyanin composition in black, blue, pink,  
313 purple, and red cereal grains. *Journal of Agriculture Food Chemistry* 54(13): 4696-4704.
- 314 Asen S, Stewart RN, Norris KH. 1972. Co-pigmentation of anthocyanins in plant tissues and its  
315 effect on color. *Phytochemistry* 11(3): 1139-1144
- 316 Barkoudah YI. 1962. Revision of *Gypsophila*, *Bolanthus*, *Ankyropetalum* and *Phryna*. *Wentia* 9:  
317 1-203.
- 318 Bevill RL, Louda SM, Stanforth LM. 1999. Protection from natural enemies in managing rare  
319 plant species. *Conservation Biology* 13(6): 1323-1331.
- 320 Chen S, Yao H, Han J, Liu C, Song J, Shi L, Zhu Y, Ma X, Gao T, Pang X, Luo K, Li X, Jai X,  
321 Lin Y, Leon C. 2010. Validation of the ITS2 region as a novel DNA barcode for

- 322 identifying medicinal plant species. *PloS One* 5(1): e8613. doi:  
323 10.1371/journal.pone.0008613L
- 324 Clement M, Snell Q, Walker P, Pondosa D, Crandall KA. 2002. TCS: Estimating gene  
325 genealogies. Parallel and Distributed Processing Symposium, International Proceedings,  
326 2, 184.
- 327 de Pascual-Teresa S, Santos-Buelga C, Rivas-Gonzalo JC. 2002. LC–MS analysis of  
328 anthocyanins from purple corn cob. *Journal of the Science of Food and*  
329 *Agriculture* 82(9): 1003-1006.
- 330 Darwent AL, Coupland RT. (1966). Life history of *Gypsophila paniculata*. *Weeds* 14(4): 313-  
331 318.
- 332 Department of Natural Resources (DNR). 2015. Michigan Invasive Species Grant Program  
333 Handbook. [http://www.michigan.gov/documents/dnr/2015-MISGP-](http://www.michigan.gov/documents/dnr/2015-MISGP-hndbk_491809_7.pdf?source=govdelivery)  
334 [hndbk\\_491809\\_7.pdf?source=govdelivery](http://www.michigan.gov/documents/dnr/2015-MISGP-hndbk_491809_7.pdf?source=govdelivery)
- 335 Edgar RC. 2004. MUSCLE: multiple sequence alignment with high accuracy and high  
336 throughput. *Nucleic Acids Research* 32(5): 1792-1797.
- 337 Emery SM, Doran PJ, Legge JT, Kleitch M, Howard S. 2013. Aboveground and belowground  
338 impacts following removal of the invasive species baby's breath (*Gypsophila paniculata*)  
339 on Lake Michigan sand dunes. *Restoration Ecology* 21(4): 506-514.
- 340 Fay MF, Swensen SM, Chase MW. 1997. Taxonomic affinities of *Medusagyne oppositifolia*  
341 (*Medusagynaceae*). *Kew Bulletin* 52(1): 111-120.
- 342 Fior S, Karis PO, Casazza G, Minuto L, Sala F. 2006. Molecular phylogeny of the  
343 Caryophyllaceae (Caryophyllales) inferred from chloroplast matK and nuclear rDNA ITS  
344 sequences. *American Journal of Botany* 93(3): 399-411.

- 345 Group CPW, Hollingsworth PM, Forrest LL, Spouge JL, Hajibabaei M, Ratnasingham S, van der  
346 Bank M, Chase MW, Cowan RS, Erickson DL, Fazekas AJ. 2009. A DNA barcode for  
347 land plants. *Proceedings of the National Academy of Sciences* 106(31): 12794-12797.
- 348 Jukes TH, Cantor CR. 1969. Evolution of protein molecules. In: Munrio HN, ed. *Mammalian*  
349 *Protein Metabolism*. New York: Academic Press. pp. 21-132
- 350 Karamanski TJ. 2000. Nationalized Lakeshore: The Creation and Administration of Sleeping  
351 Bear Dunes National Lakeshore. Online Book. National Park Service, Department of the  
352 Interior. [http://www.cr.nps.gov/history/online\\_books/slbe/](http://www.cr.nps.gov/history/online_books/slbe/)
- 353 Kumar S, Stecher G, Tamura K. 2016. MEGA7: Molecular Evolutionary Genetics Analysis  
354 version 7.0 for bigger datasets. *Molecular Biology and Evolution* 33(7): 1870-1874.
- 355 Lee SC, Wang CH, Yen CE, Chang C. 2017. DNA barcode and identification of the varieties and  
356 provenances of Taiwan's domestic and imported made teas using ribosomal internal  
357 transcribed spacer 2 sequences. *Journal of Food and Drug Analysis* 25(2): 260-274. doi:  
358 10.1016/j.jfda.2016.06.008
- 359 Leege LM, Murphy PG. 2001. Ecological effects of the non-native *Pinus nigra* on sand dune  
360 communities. *Canadian Journal of Botany* 79(4): 429-437.
- 361 Leng P, Itamura H, Yamamura H, & Deng XM. 2000. Anthocyanin accumulation in apple and  
362 peach shoots during cold acclimation. *Scientia Horticulturae*, 83(1): 43-50.
- 363 Newmaster SG, Fazekas AJ, Ragupathy S. 2006. DNA barcoding in land plants: evaluation of  
364 rbcL in a multigene tiered approach. *Botany* 84(3): 335-341.
- 365 Pringle JS. 1976. *Gypsophila scorzonerifolia* (Caryophyllaceae), a naturalized species in the  
366 Great Lakes region. *Michigan Botanist* 15: 215-219.



367 Reznicek AA, Voss EG, Walters BS. February. 2011. *Michigan Flora Online*. University of  
368 Michigan. Web. March 6, 2019. <https://michiganflora.net/genus.aspx?id=Gypsophila>.

369 Stevens OA. 1957. Weights of seeds and numbers per plant. *Weeds* 5: 46-55.

370 Stoeckle MY, Gamble CC, Kirpekar R, Young G, Ahmed S, Little DP. 2011. Commercial teas  
371 highlight plant DNA barcode identification successes and obstacles. *Scientific reports* 1:  
372 42.

373 Tamura K. 1992. Estimation of the number of nucleotide substitutions when there are strong  
374 transition-transversion and G + C-content biases. *Molecular Biology and Evolution* 9(4):  
375 678-687.

376 Templeton AR, Crandall KA, Sing CF. 1992. A cladistics analysis of phenotypic association  
377 with haplotypes inferred from restriction endonuclease mapping and DNA sequence data.  
378 III. Cladogram estimation. *Genetics* 132: 619-633.

379 The Nature Conservancy (TNC). 2014. Lake Michigan Coastal Dunes Restoration Project. 2013  
380 Field Season Report. The Nature Conservancy and Partners, Lansing, Michigan

381 Voss, EG. 1957. Observations on the Michigan flora—VI. Distribution records of some  
382 angiosperms new, rare, or misinterpreted in the state. *Brittonia* 9(2): 83-101.

383 Voss EG, Reznicek, AA. 2012. *Field manual of Michigan flora*. Ann Arbor: University of  
384 Michigan Press.

385

386 Yao H, Song J, Liu C, Luo K, Han J, Li Y, Pang X, Xu H, Zhu Y, Xiao H, & Chen S. 2010. Use  
387 of ITS2 region as the universal DNA barcode for plants and animals. *PLoS One* 5(10):  
388 e13102.

389

390

391 **Figure Legends**

392 Figure 1: (A) Green-yellow morph, (B) common purple morph and (C) stem of the green-yellow  
393 and purple baby's breath morph found in Sleeping Bear Dunes National Lakeshore.

394

395 Figure 2: Phylogenetic analysis of the purple and green-yellow baby's breath color morphs in  
396 relationship to other *Gypsophila* species. All evolutionary histories were inferred using  
397 maximum likelihood methods. (A) Phylogeny based on the *rbcL* region, (B) phylogeny based on  
398 the *matK* region, (C) phylogeny based on the ITS2 region, (D) Phylogeny based on *rbcL*, *matK*,  
399 and ITS2 combined. For *rbcL* and ITS2 we used a Jukes Cantor (JC) model of molecular  
400 evolution (Jukes and Cantor, 1969). For *matK* we used a Tamura 3-parameter (T92) model of  
401 molecular evolution with uniform distribution, and for the combined data set we used the T92  
402 model of molecular evolution with a gamma distribution (Tamura 1992).

403

404 Figure 3: A TCS haplotype network based on *rbcL*, *matK* and ITS2 combined for the purple and  
405 green-yellow baby's breath color morphs and the *G. paniculata*, *G. elegans*, *G. perfoliata*, and  
406 *G. scorzonifolia* reference sequences. The size of the ovals correspond to the haplotype  
407 frequency. The hash marks represent the number of mutations between each haplotype.

408

409 Figure 4: (A) Green-yellow morph, and (B) common purple morph after 5-months in the GVSU  
410 greenhouse. Note the similarity in taproot structure between the two plants.

411

412

413

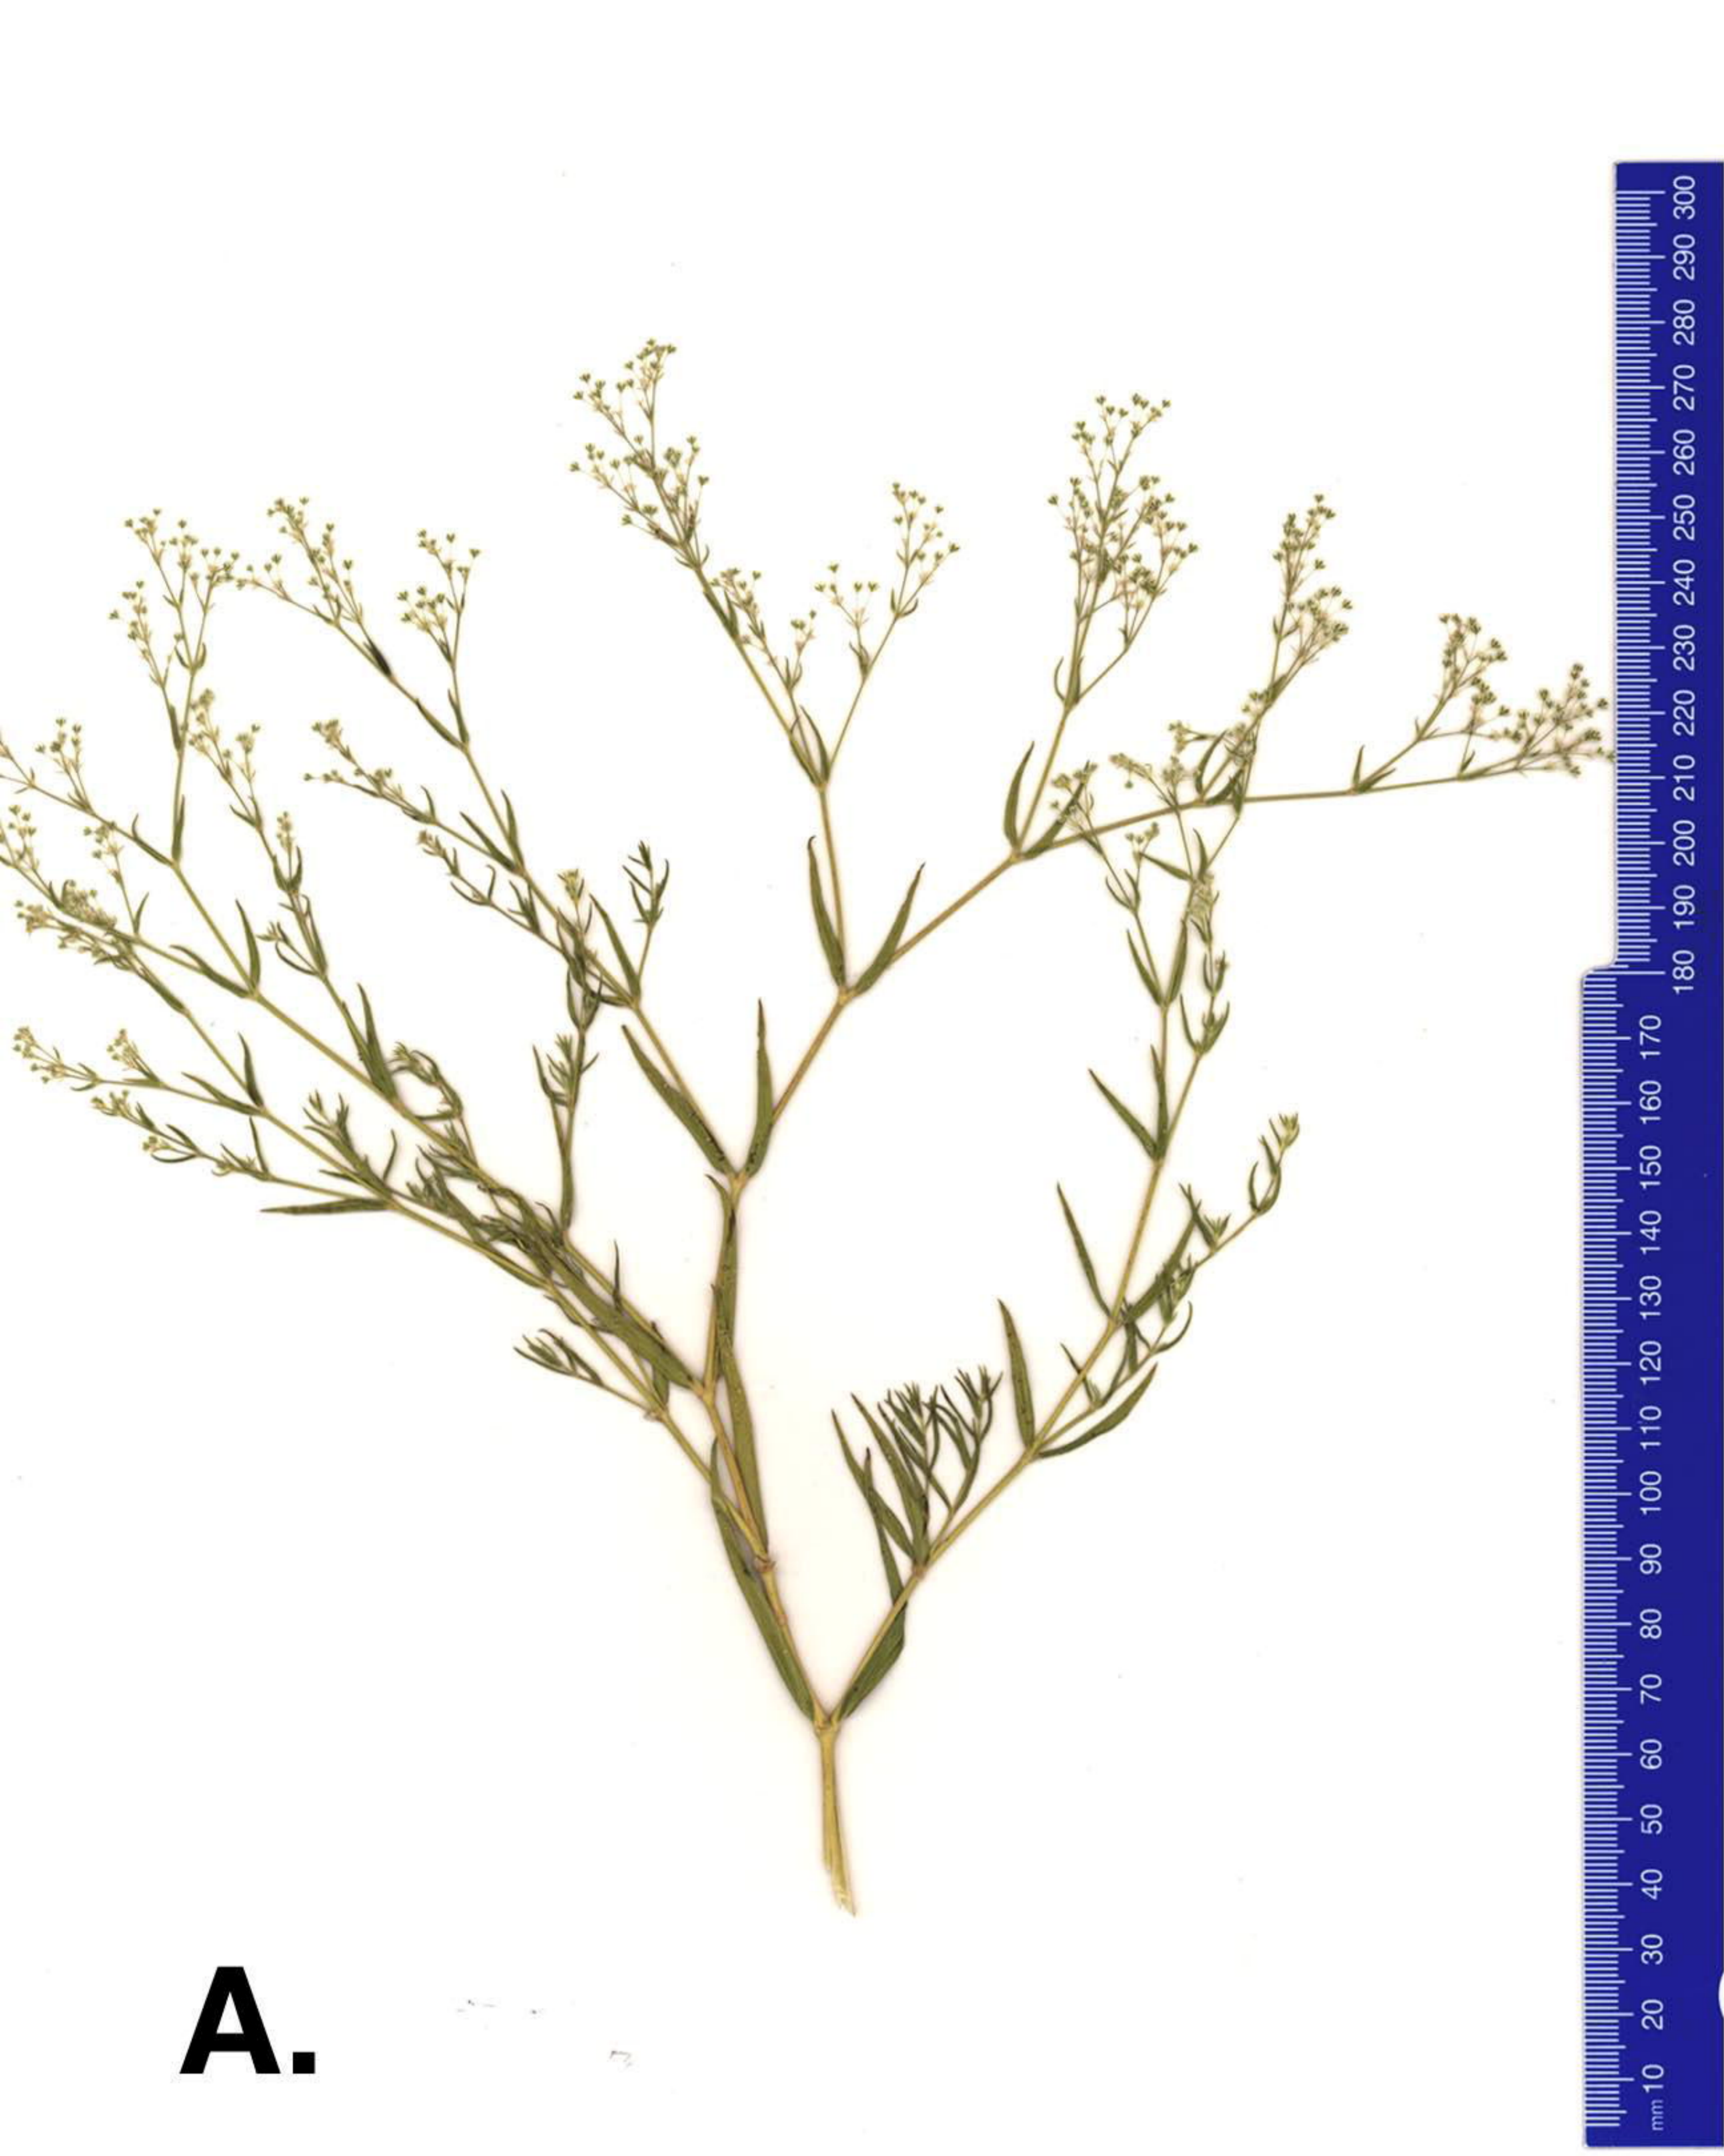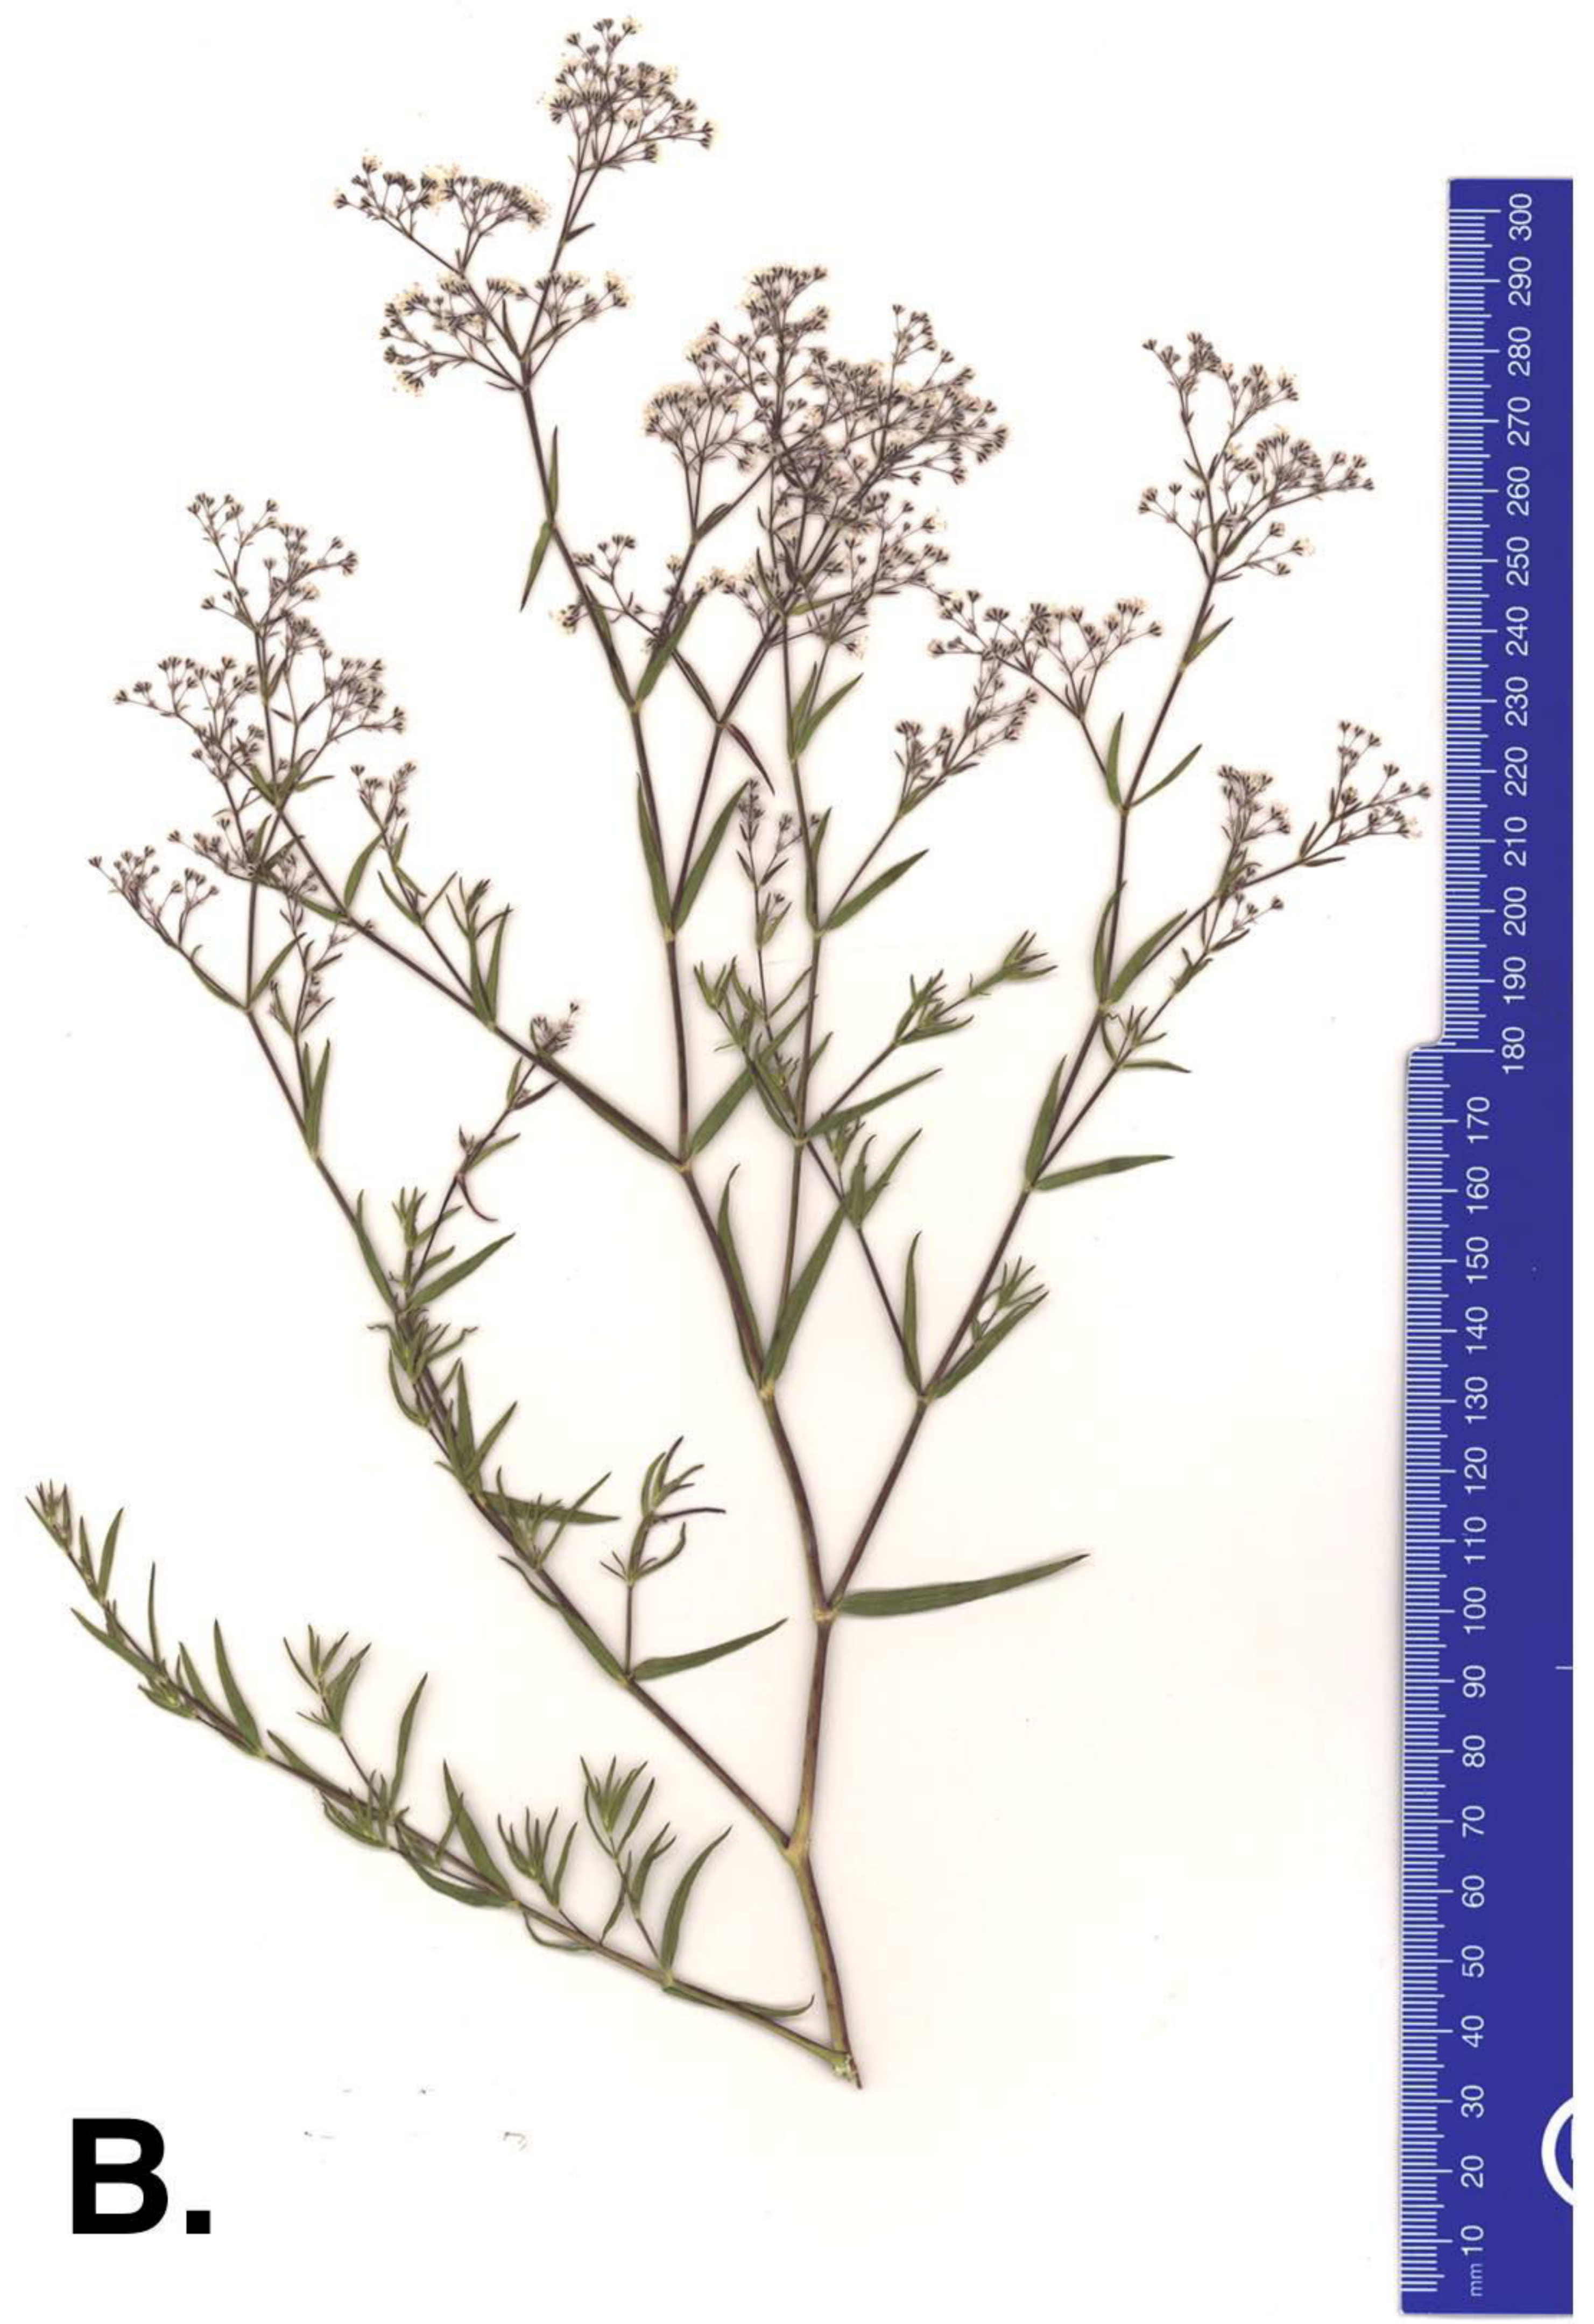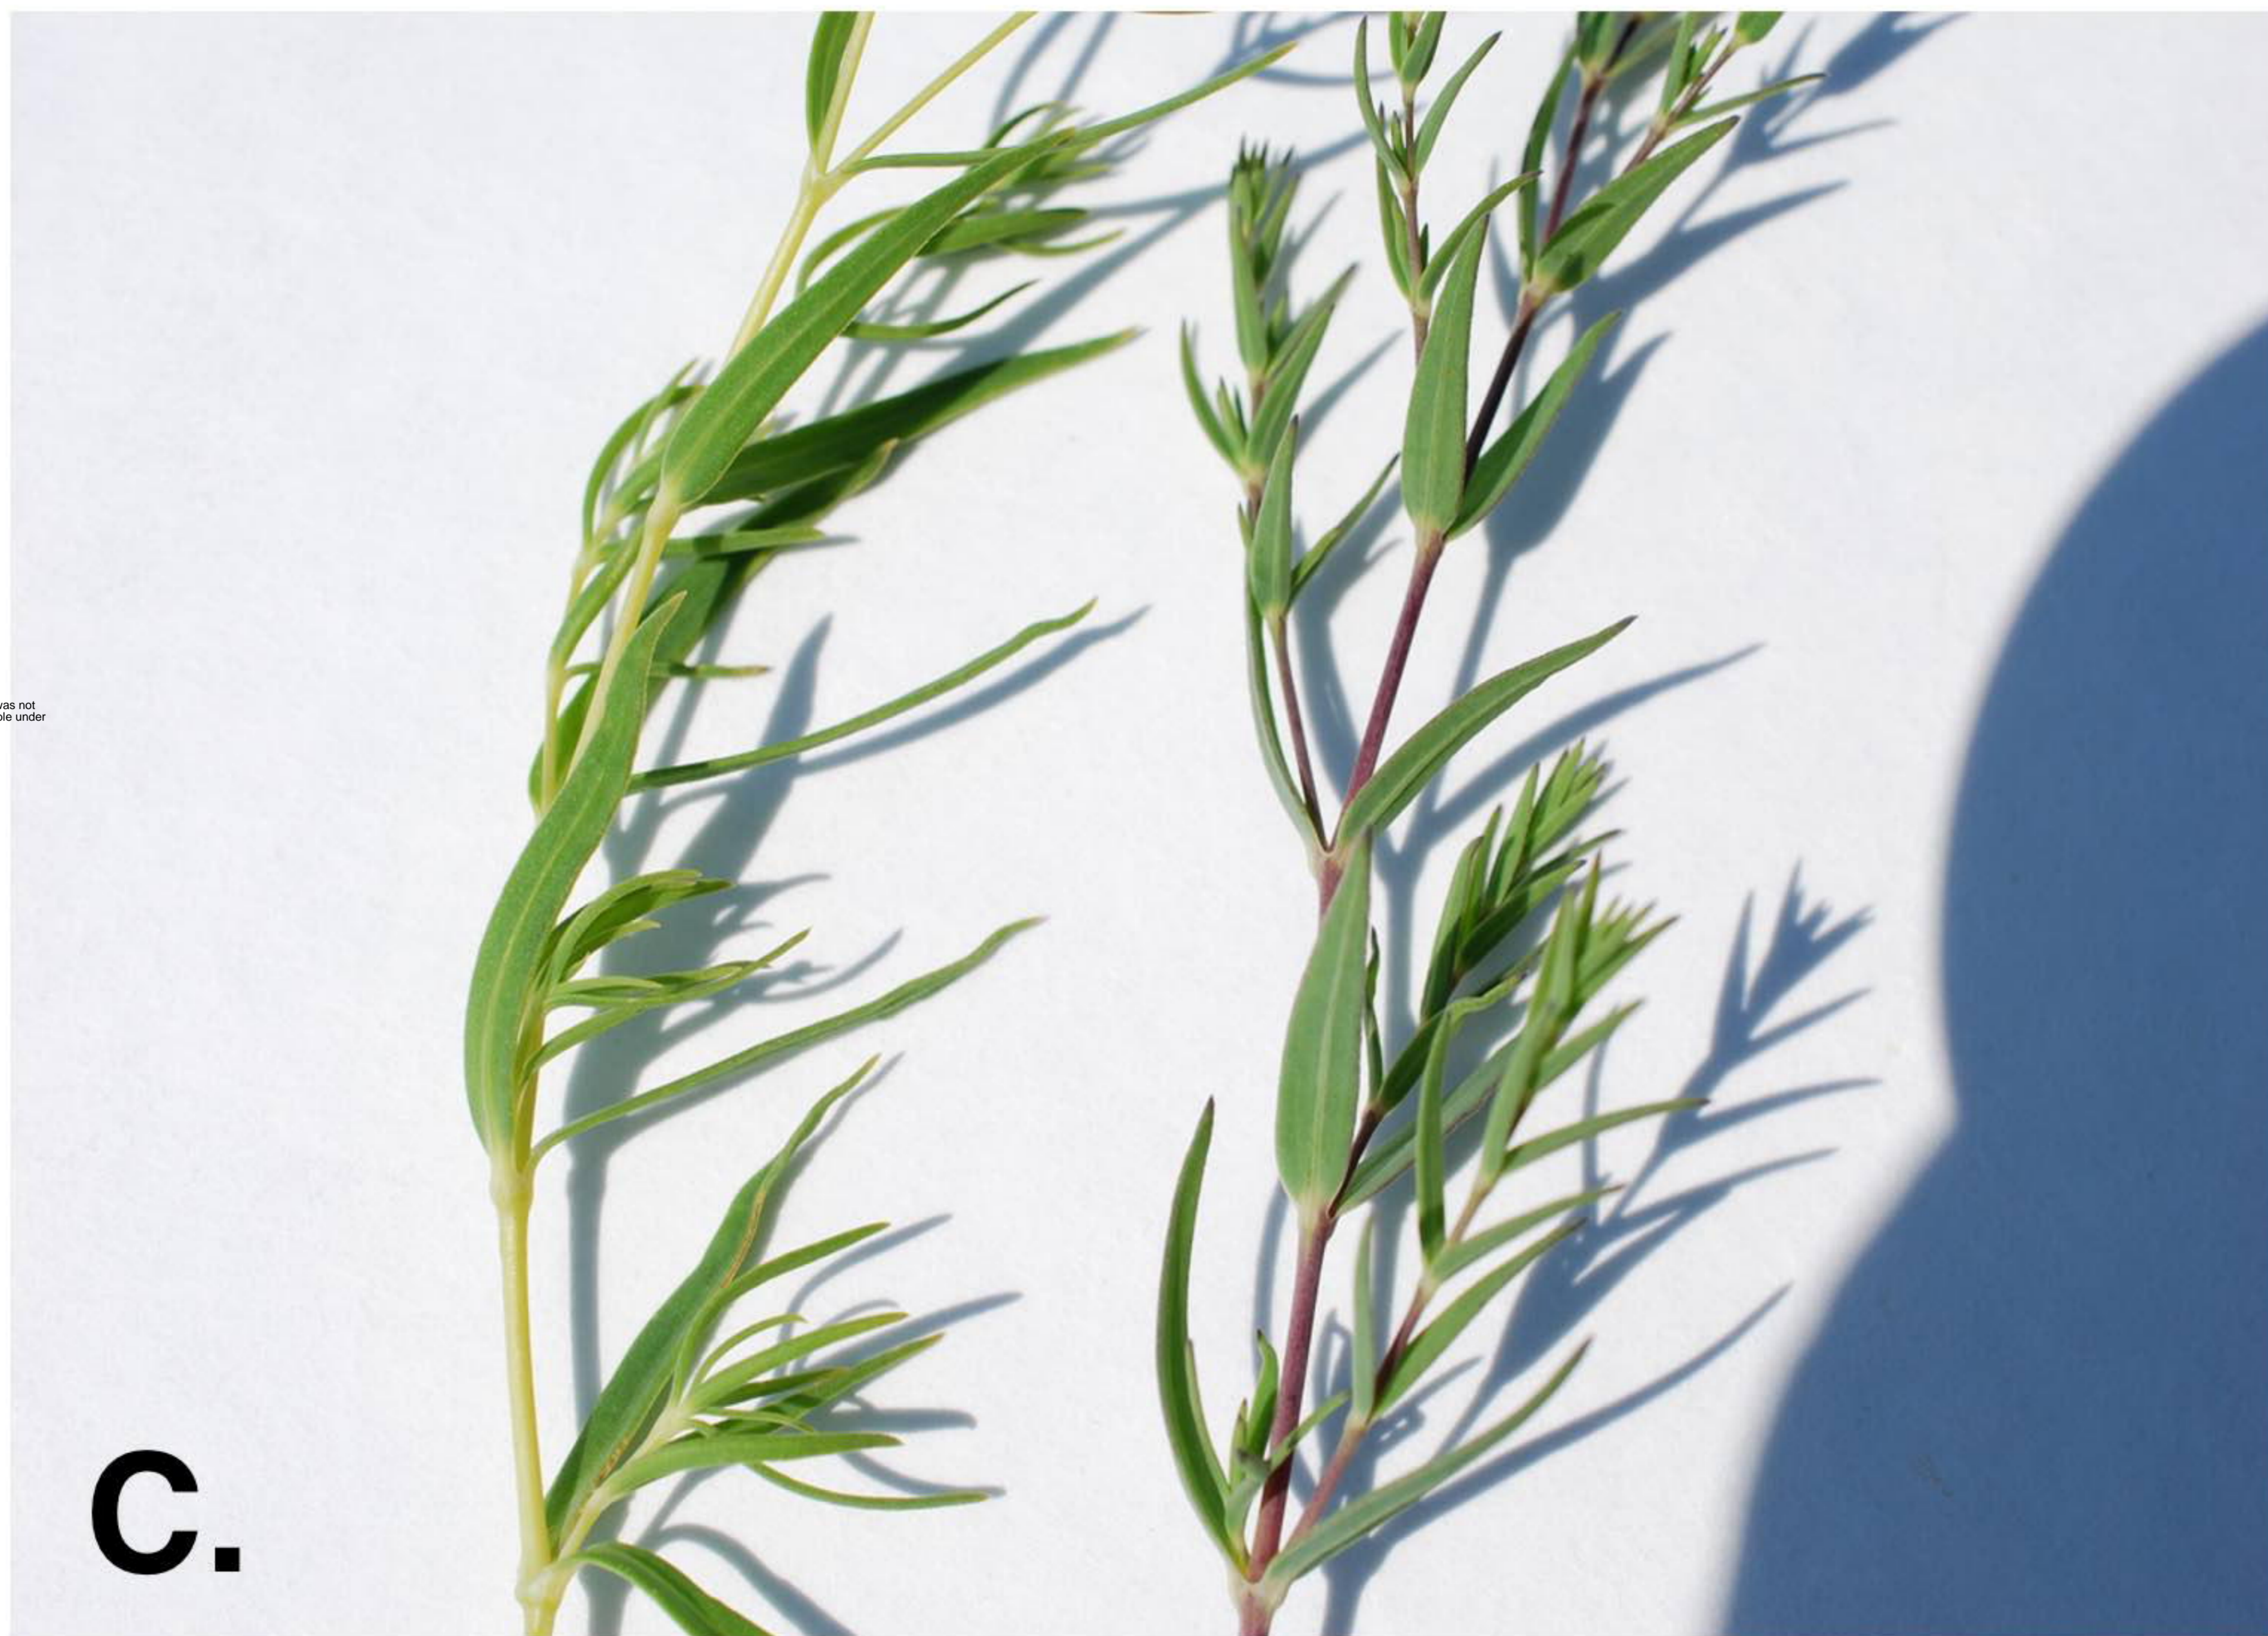

**A. rbcL**

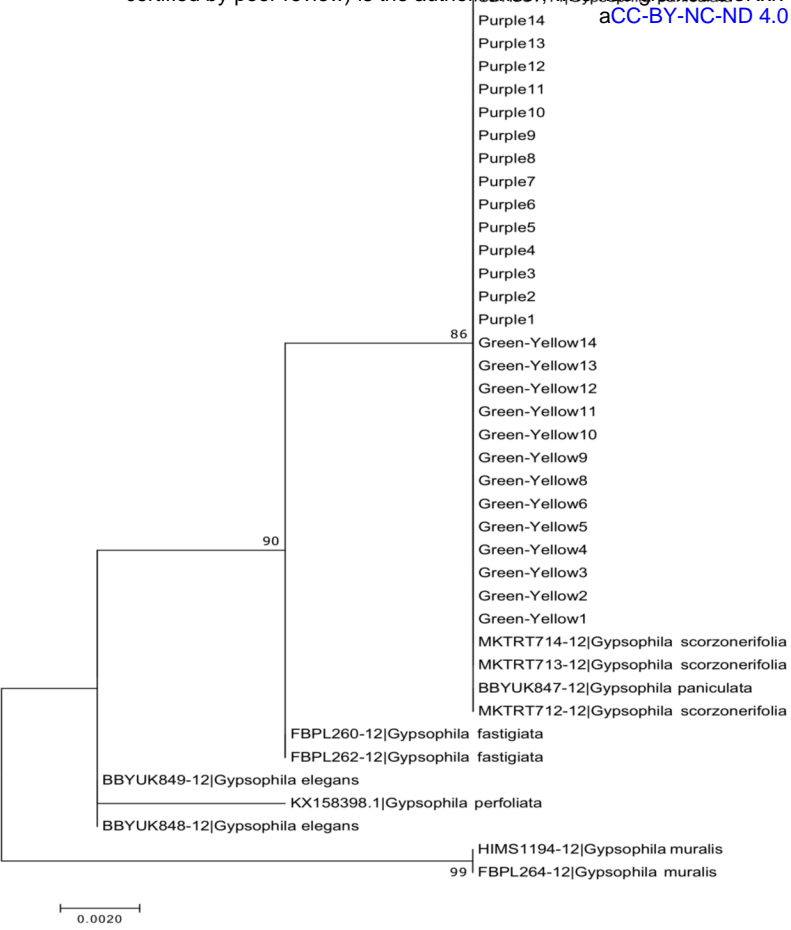

**B. matK**

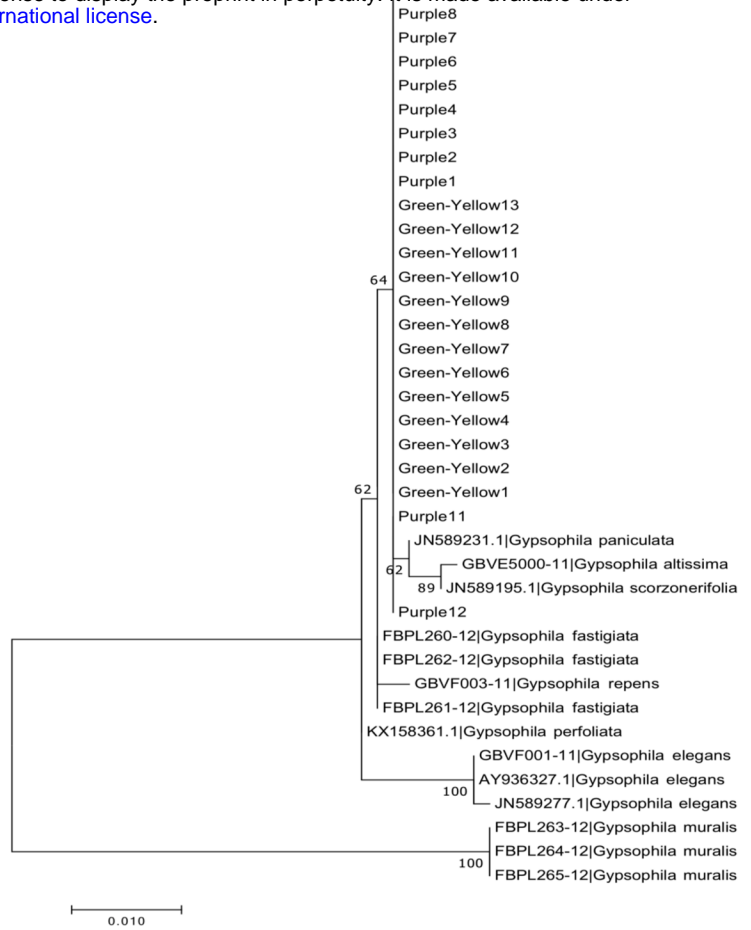

**C. ITS2**

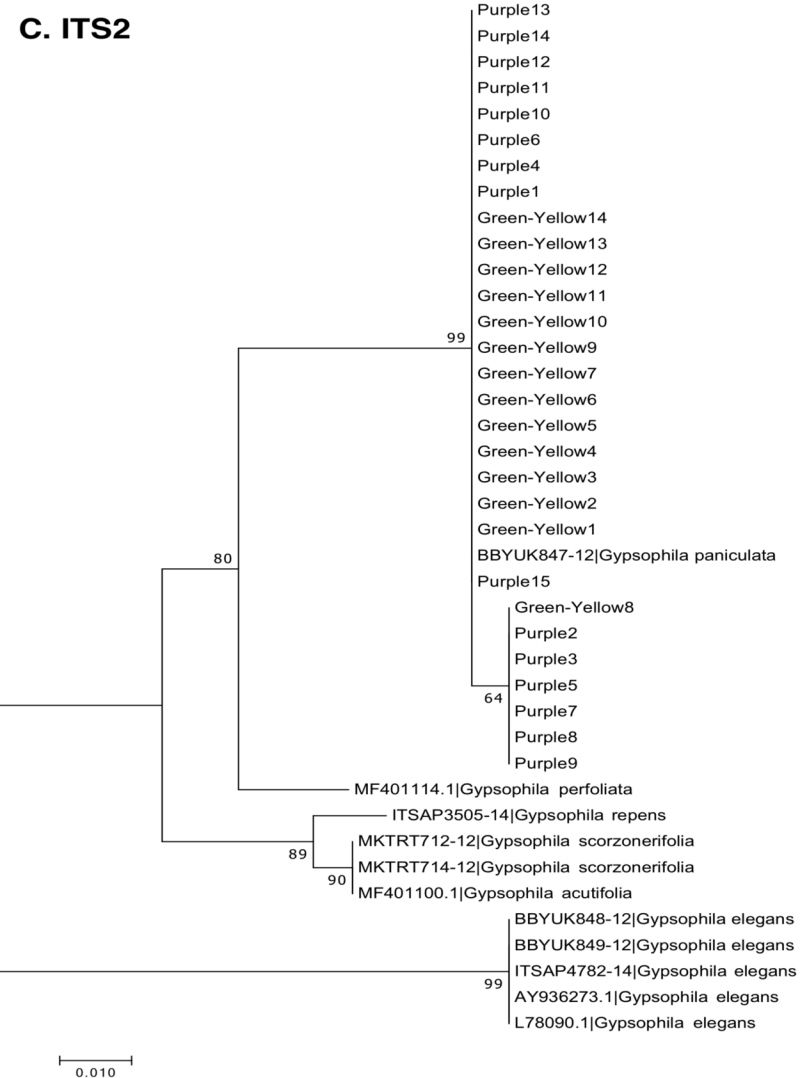

**D. All Sequences**

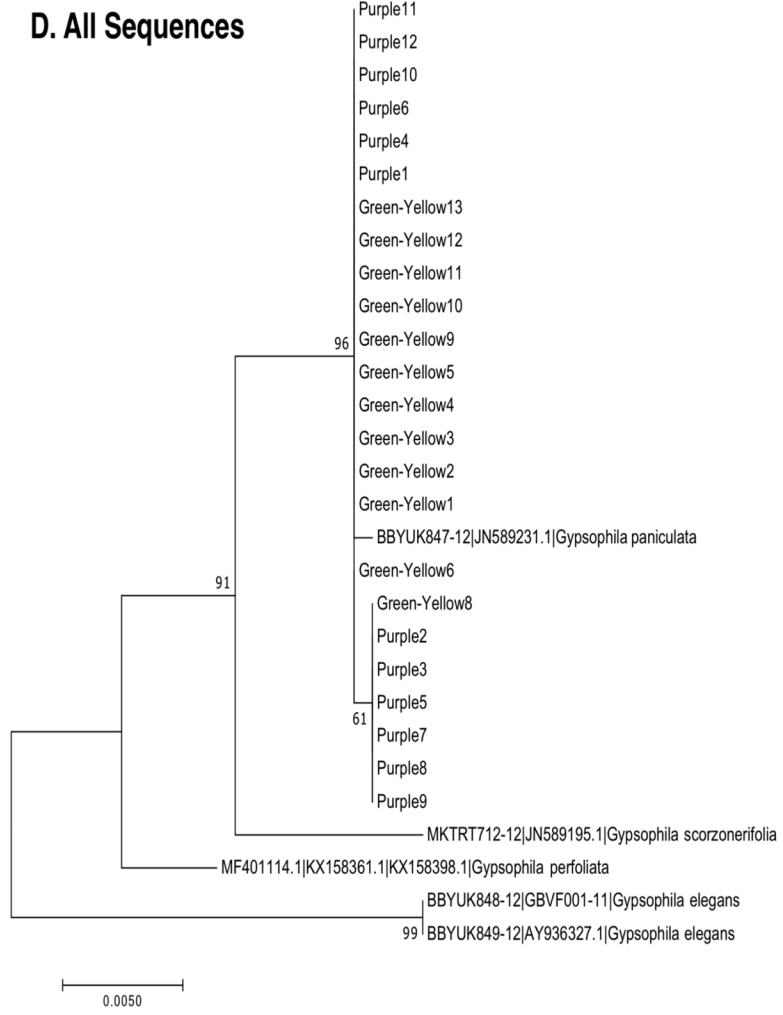

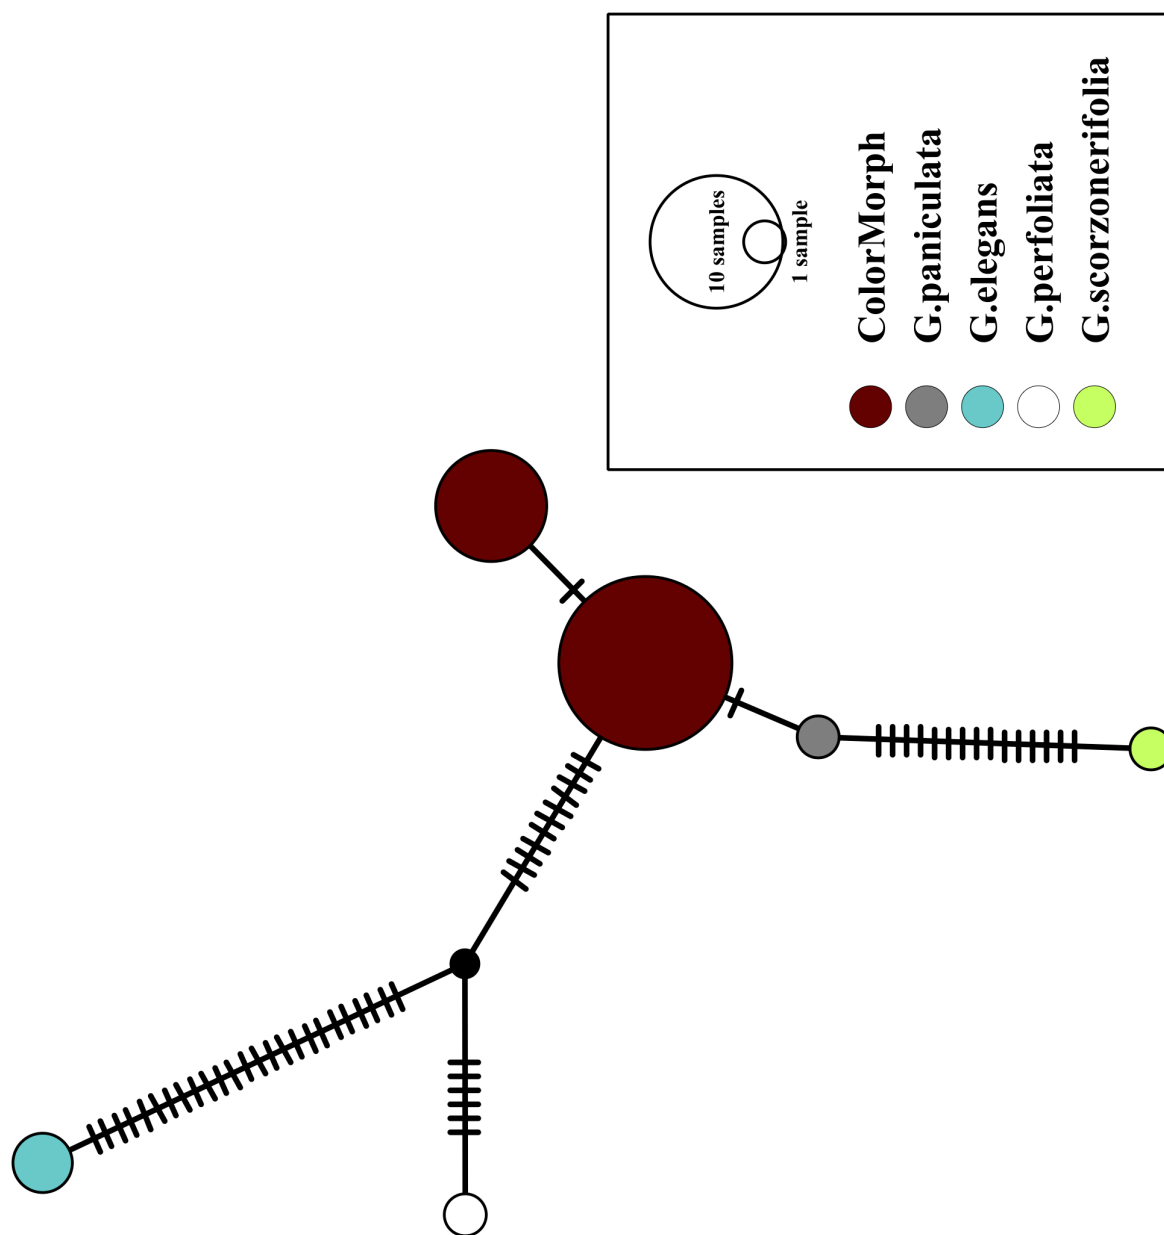

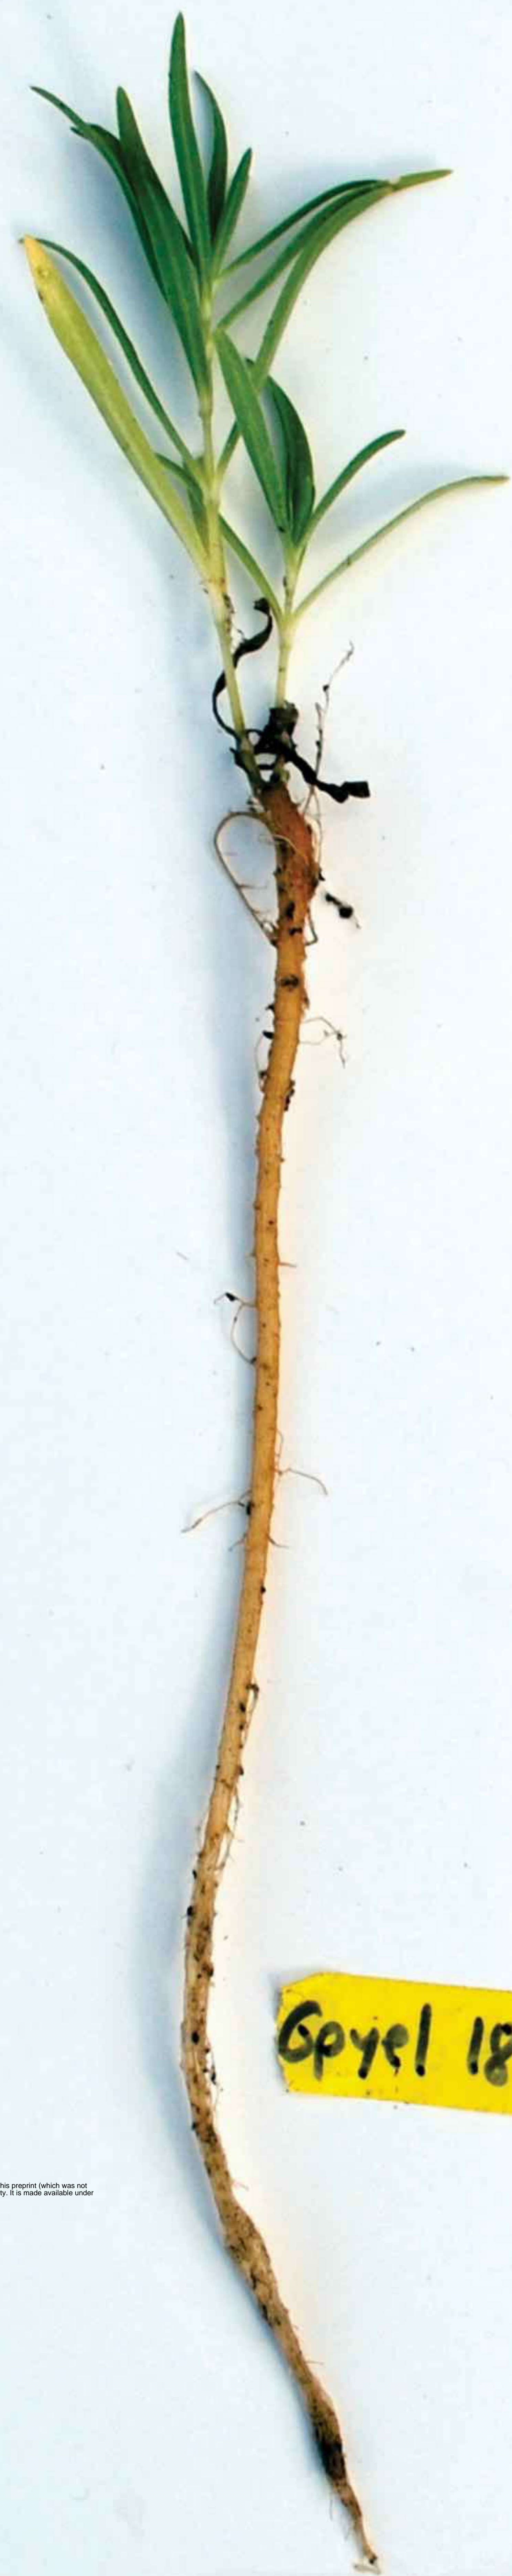

J-81 134dy

A

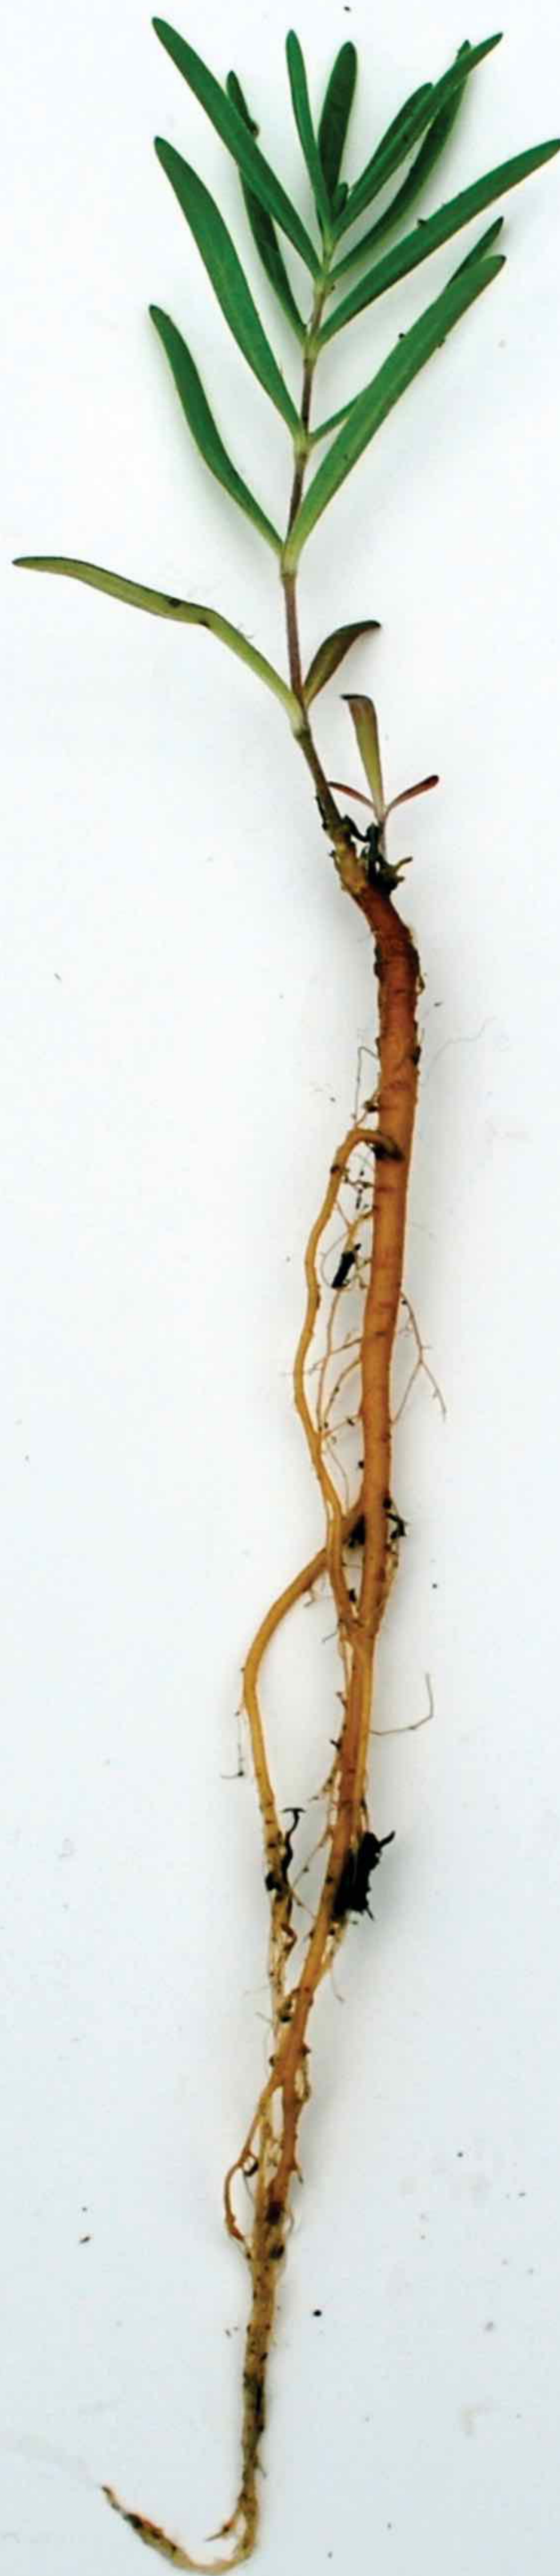

bbp220 A

B
