1 Identification and characterization of *Gypsophila paniculata* color morphs in Sleeping Bear  
2 Dunes National Lakeshore, MI, USA.

3

4 Marisa L. Yang<sup>1</sup>, Emma Rice<sup>2</sup>, Hailee Leimbach-Maus<sup>2</sup>, and Charlyn G. Partridge<sup>2</sup>

5

6 <sup>1</sup>Environmental Science Policy, and Management, University of California, Berkeley, 260  
7 Mulford Hall, Berkeley, CA 94720, email: marisayang79@gmail.com

8 <sup>2</sup>Annis Water Resources Institute, 740 W. Shoreline Dr., Muskegon, MI 49441, email:  
9 riceemm@mail.gvsu.edu; hailee.pavisich@gmail.com

10

11 Corresponding author: Charlyn Partridge, Annis Water Resources Institute, Grand Valley  
12 State University, 740 W. Shoreline Dr., Muskegon, MI; 49441, email: partridc@gvsu.edu

13

14

## 15 **Abstract**

16

17 *Gypsophila paniculata* (baby's breath) is an invasive species found throughout much of the

18 northwest United States and western Canada. Two distinct color morphs of baby's breath

19 were identified in areas within the coastal dunes along eastern Lake Michigan. The more

20 common morph produces stems that are purple in color (purple morph), while the atypical

21 morph has stems that are green-yellow (green-yellow morph). The purpose of this study

22 was to characterize these morphs and determine if they are genetically distinct species in

23 order to assess whether alternative management strategies should be employed to control

24 these populations. We sequenced two chloroplast regions, RbcL and MatK, and one nuclear

25 region, ITS2, from the purple morphs and green-yellow morphs collected from Sleeping

26 Bear Dunes National Lakeshore, MI, USA. Sequences were aligned with reference *G.*

27 *paniculata* and *G. elegans* sequences obtained from GenBank and the Barcode of Life

28 (BOLD) databases. Phylogenetic analyses suggest that the two color morphs belong to *G.*

29 *paniculata* and do not appear to be distinct genetic strains. We propose that current

30 management practices continue to treat the two color morphs in a similar manner in terms

31 of removal to prevent the further spread of this species.

32  
33  
34  
35  
36  
37  
38  
39  
40  
41  
42  
43  
44  
45  
46  
47  
48  
49  
50  
51  
52  
53  
54  
55

## Introduction

The Great Lakes sand dunes comprise the most extensive freshwater dune complex in the world, stretching over 1,000 km<sup>2</sup> in Michigan alone. Within northwest Michigan, the sand dunes ecosystem is vital both environmentally and economically. It is home to a number of threatened and endangered species, including piping plover (*Charadrius melodus*) and Pitcher's thistle (*Cirsium pitcheri*). The colonization of invasive species into this region can significantly alter the biological composition of native communities (Olson 1958, Leege and Murphy 2001, Emery et al. 2013). One invasive species of significant concern is the perennial baby's breath (*Gypsophila paniculata*). In 2015, baby's breath was listed by the Department of Natural Resources (DNR) as a "priority" invasive species for detection and control in Michigan's northern lower peninsula (DNR 2015). Since its colonization in the region it has spread along a 260 km stretch of the Michigan shoreline. Baby's breath produces a large primary taproot that can extend down to 4 meters in depth, which likely helps it outcompete native vegetation for limited resources (Darwent and Coupland 1966, Karamanski 2000). The presence of baby's breath in this system is associated with a reduction in the number of threatened Pitcher's thistle and an increase in the number of other non-native species (Emery et al. 2013). In addition, while many of the vulnerable and endangered plant species in these areas are seed limited, (e.g., Pitcher's thistle produces approximately 50-300 seeds per plant (Bevill et al. 1999)), baby's breath can produce up to 14,000 seeds per plant annually (Stevens 1957), effectively outcompeting native species in terms of overall yield. This has led to baby's breath composing approximately 50-80% of the ground cover in some areas (Karamanski 2000, Emery et al. 2013).

56           One concern with current management efforts is that there is some anecdotal evidence  
57 that there may be a new baby's breath variant (morph) within the Michigan dune system. In 2011  
58 and 2012 The Nature Conservancy (TNC) removal crews reported baby's breath plants with  
59 different character traits than what is commonly observed (TNC 2014). The atypical morph has  
60 stems and leaves that are lighter in color and more yellow than the common purple morph  
61 (Figure 1a-c). The purple morph has a thick taproot (4-7 cm in diameter) just below the caudex  
62 that remains unbranched for approximately 60 – 100 cm (Darwent & Coupland 1966). Severing  
63 just below the intersection of the caudex and the taproot is where manual removal efforts target  
64 to limit regrowth. However, the atypical green-yellow morph's root system was reported by TNC  
65 to be more diffuse, making it harder to identify a primary taproot and thus, harder to sever  
66 without the potential for regrowth (TNC 2014). Currently, these green-yellow morphs are treated  
67 with herbicide application (glyphosate) when observed; however, if this morph continues to  
68 spread into areas where threatened or endangered species are present, removal methods will be a  
69 primary concern. If the green-yellow morph and the purple morph represent two discrete species,  
70 then alternative management strategies may need to be considered for these populations.

71           One of the first steps toward adapting current management strategies for this population  
72 is to identify whether the green-yellow morph is genetically distinct from the purple morph.  
73 While *G. paniculata* is the dominant invasive baby's breath species in northwest Michigan, there  
74 are a number of distinct *G. paniculata* commercial strains that could potentially invade these  
75 areas considering seeds are commonly sold in stores throughout the region (personal  
76 observation). In addition, other baby's breath species, including *G. elegans* are sold in this region  
77 in commercial wildflower packets. *G. elegans* is an annual species that has a smaller taproot  
78 compared to *G. paniculata*, and its coloration is similar to that of the green-yellow morph. Thus,

79 the goal of this work was to use traditional ‘barcode’ genes for plants to characterize the genetic  
80 relationship between the green-yellow morph and the common purple morph.

81  
82 **Methods and materials**

83  
84 *DNA Extraction, Amplification, and Sequencing*

85  
86 We collected leaf tissue from 1 green-yellow morph and 16 purple morphs in 2016 and  
87 an additional 15 green-yellow morphs in 2017 from Sleeping Bear Dunes National Lakeshore  
88 (SBDNL), Empire, MI, USA (specifically: 44.884941 N, 86.062111 W and 44.875302 N,  
89 86.056821 W). Leaf tissue was dried in silica gel until DNA extractions could take place. DNA  
90 was extracted using Qiagen DNeasy Plant Mini Kits (Qiagen, Hilden, Germany). After  
91 extraction, the DNA samples were placed through Zymo OneStep PCR inhibitor removal  
92 columns (Zymo, Irvine, CA) to remove any secondary metabolites that might inhibit PCR  
93 amplification. The DNA for each sample was then quantified using a NanoDrop 2000  
94 (ThermoFisher, Waltham, MA).

95 The DNA of both green-yellow morphs and purple morphs was amplified at three  
96 proposed ‘barcoding’ genes for plants: large subunit of the ribulose-bisphosphate carboxylase  
97 gene (RbcL), maturase K (MatK), and internal transcribed spacer 2 (ITS2). The RbcL region was  
98 amplified using RbcL 1F and RbcL 724R primers (Chen et al. 2010), MatK was amplified using  
99 MatK 390F and MatK 1440R primers (Fior et al. 2006), and the ITS2 region was amplified using  
100 ITS2 2SF and ITS2 S3R primers (Chen et al. 2010). Individual PCR reactions for all loci  
101 consisted of 1X Taq Buffer, 2.0 mM MgCl<sub>2</sub>, 0.3 μM dNTP, 0.08 mg/mL BSA, 0.4 μM forward  
102 and reverse primers, and 0.5 units of Taq polymerase in a 20 μL reaction volume. The thermal  
103 cycle protocols consisted of the following: for RbcL, an initial denaturing step of 95°C for 2

104 minutes, followed by 35 cycles of 94°C for 1 minute, 55°C for 30 seconds, and 72°C for 1  
105 minute. A final elongation step was performed at 72°C for 7 minutes. For MatK, the thermal  
106 profile consisted of 26 cycles of 94°C for 1 minute, 48°C for 30 seconds, and 72°C for 1 minute,  
107 followed by a final elongation step at 72°C for 7 minutes. For ITS2, an initial denaturing step of  
108 95°C for 2 minutes was applied, followed by 35 cycles of 95°C for 30 seconds, 50°C for 30  
109 seconds, 72°C for 1.5 minutes, and a final elongation step of 72°C for 8 minutes. Successful  
110 amplification was checked by running the PCR product on a 2% agarose gel stained with  
111 ethidium bromide. PCR reactions were then cleaned using ExoSAP-IT PCR Product Cleanup  
112 Reagent (ThermoFisher, Waltham, MA). Sequencing reactions were performed for both forward  
113 and reverse primers for each of the three genes. Sequencing reactions were cleaned using a  
114 Sephadex column (GE Healthcare Life Science, Marlborough, MA) and sequenced on an ABI  
115 Genetic BioAnalyzer 3130xl (Applied Biosystems, Foster City, CA). Out of the 16 green-yellow  
116 morphs a total of 13 were successfully sequenced for RbcL, 13 were successfully sequenced for  
117 MatK, and 14 were successfully sequenced for ITS2. For the purple morphs a total of 15, 12, and  
118 15 individuals were successfully sequenced for RbcL, MatK and ITS2, respectively.

119 *G. paniculata* and *G. elegans* reference sequences for RbcL, MatK, and ITS2 were  
120 downloaded either from GenBank (<https://www.ncbi.nlm.nih.gov/genbank/>) or the Barcode of  
121 Life Database (BOLD) (<http://www.barcodeoflife.org>). Their accession numbers and sequences  
122 are provided in Supplemental Table 1. All fasta files corresponding to these data will be  
123 deposited in the Dryad database and sequences will be submitted to GenBank.

#### 124 *Alignment and Phylogenetic Analysis*

125 All success sequences from our field samples, as well as sequences for *G. elegans*  
126 and *G. paniculata* obtained from GenBank or BOLD, were imported into the program

127 MEGA7 (version 7.0.14) (Kumar et al. 2016) and sequences for each of the three genes  
128 were aligned both individually and with all sequences combined using Muscle (Edgar  
129 2004). The total number of base pairs aligned and analyzed for each region included: 516  
130 base pair (bp) for RbcL, 720 bp for MatK, 264 bp for ITS2, and 1498 bp for the three regions  
131 combined. All alignment parameters were kept at their default settings. Once aligned, we used  
132 MEGA7 to identify the most appropriate substitution model (RbcL: Jukes-Cantor, MatK:  
133 Tamura 3-parameter, ITS2: Jukes-Cantor, all genes combined: Tamura 3-parameter). We then  
134 created phylogenetic trees using a maximum-likelihood (ML) approach with 500-replicated  
135 bootstrap analyzes, as well as using neighbor joining, and parsimony models. We also  
136 constructed a haplotype network based upon the combined sequences using the statistical  
137 parsimony approach (Templeton et al. 1992) in the program TCS (v 1.21) (Clement et al. 2000).  
138 For TCS, gaps were treated as missing data and we used a 95% connection limit.

139

## 140 **Results and Discussion**

141 Our results indicate that the green-yellow morph identified in SBDNL is not a genetically  
142 distinct species from the common purple *G. paniculata* found throughout SBDNL. The RbcL,  
143 MatK, ITS2, and combined dataset showed similar patterns with both the green-yellow morphs  
144 and the purple morphs clustering together with a *G. paniculata* reference sequence, and  
145 separately from *G. elegans* reference sequences (Figure 2a-d; Supplemental Figure 1-8). In  
146 addition, the TCS haplotype network shows that purple and green-yellow morphs have shared  
147 haplotypes. These haplotypes group within the same network as the *G. paniculata* reference,  
148 while the *G. elegans* references were grouped in an independent network (Figure 3). This  
149 suggests that both color morphs belong to *G. paniculata*.

150 Of the regions analyzed for the green-yellow morphs, purple morphs, and reference  
151 sequences, RbcL was the most conserved sequence with an overall mean genetic distance ( $d$ ) =  
152 0.001, followed by MatK ( $d = 0.002$ ) and ITS2 ( $d = 0.018$ ). For the ITS2 region, there were 6  
153 purple *G. paniculata* morphs and one green-yellow morph that clustered together inside the *G.*  
154 *paniculata* branch (Figure 2a & 2d). Further examination of the chromatograms for these  
155 individuals show that they are likely heterozygous at position 195 of our aligned sequence and  
156 amplification bias of the ‘A’ SNP over the allele containing the ‘G’ SNP is driving this pattern.

157 The phylogeny constructed from the RbcL sequence showed one *G. paniculata* reference  
158 sequence (SDH831-14) grouping together with *G. elegans*. All reference sequences for RbcL  
159 were obtained from the BOLD database, and it is possible that this specific individual was  
160 misidentified. Further examination of this specimen from the herbarium image posted to BOLD  
161 indicates a small taproot compared to the upper foliage  
162 ([http://www.boldsystems.org/pics/SDH/CCDB-24938-B09\\_h235508%2B1424896806.jpg](http://www.boldsystems.org/pics/SDH/CCDB-24938-B09_h235508%2B1424896806.jpg)),  
163 which is one characteristic of the annual *G. elegans*. While there is also sequence data for both  
164 the ITS2 and MatK regions for this specimen in BOLD, these were not used for this dataset due  
165 to higher levels of sequence fragmentation compared to our samples. However, both the ITS2  
166 and MatK sequences from this *G. paniculata* reference sequence aligned most closely to *G.*  
167 *elegans* in BLAST.

168 While our data suggest that both the purple and green-yellow morphs are *G. paniculata*,  
169 whether the green-yellow morph is a different commercial genetic strain is still unclear. RbcL,  
170 MatK, and ITS2 are common ‘barcode’ genes used to delineate plant species, but their ability to  
171 distinguish genetically distinct strains of the same species can be limited. RbcL and MatK are  
172 highly conserved and would likely not distinguish between different cultivars; however, ITS2 is

173 more variable and has been used to distinguish between different varieties of domestic and  
174 imported teas (*Camellia sinensis*) (Lee et al. 2017). In our dataset, the purple and green-yellow  
175 morphs from SBDNL grouped separately from the *G. paniculata* reference sequence, but within  
176 the same clade. The *G. paniculata* reference sequence for ITS2 was obtained from GenBank and  
177 is part of an unpublished study, so we do not have information regarding where this sample was  
178 collected. However, given the distinct grouping between the *G. paniculata* reference sequence  
179 and our samples, ITS2 may be a promising region to assess the ability to distinguish among  
180 different commercial strains or regional varieties of *G. paniculata*. If this is the case, then our  
181 data would suggest that the purple and yellow-green morphs not only belong to the same species  
182 (*G. paniculata*), but are likely derived from the same or similar initial source populations.

183         The mechanism driving the color difference between the purple and green-morphs is  
184 currently unknown. Within SBDNL, the purple morph is the most common form, with green-  
185 yellow individuals found interspersed in a couple of locations throughout the dunes. The largest  
186 observed group of green-yellow morphs consists of a few hundred plants clumped within  
187 approximately an acre-sized area and interspersed throughout large groups of purple morphs.  
188 Occasionally, small pockets of green-yellow individuals have also been found together in other  
189 areas of SBDNL and Zetterberg Preserve (approximately 38 km from SBDNL). Based upon the  
190 dispersal patterns of the two morphs throughout the dunes, the color difference observed does  
191 not appear to be solely environmentally driven, and likely has a genetic component. Potential  
192 candidate genes could include those involved in the anthocyanin pathway, which influences red –  
193 purple coloration in a number of plants (Asen et al. 1972, de Pascual-Teresa et al. 2002, Abdel-  
194 Aal et al. 2006, Knievel et al. 2009). Further work will begin to elucidate the specific mechanism



195 influencing these color difference in invasive *G. paniculata* populations, as well as to explore  
196 whether this color difference drives functional differences between the morphs.

197 In terms of management strategies, the purple and green-yellow morph are not distinct  
198 species and are likely derived from the same genetic strain, so there does not appear to be a need  
199 to manage these two morphs differently. One concern with the green-yellow morph initially  
200 noted by TNC removal crews was that the taproot tended to be more diffuse than the purple  
201 morph potentially making manual removal of these plants less effective. We are currently  
202 examining root growth between the green-yellow and purple morphs under controlled  
203 conditions; however, our lab's personal observations in the field have not found any indication  
204 that large differences in root structure occur between mature plants of the two color morphs.  
205 Therefore, current management approaches for these populations should be maintained to control  
206 the further spread of *G. paniculata* throughout the Michigan coastal dune system.

## 207 **Acknowledgements**

208 This project was funded through an EPA-Great Lakes Restoration Initiative Grant (C.G.P) and  
209 through an NSF-REU grant (REU-QUEST) based at Annis Water Resources Institute. We would  
210 like to thank Shaun Howard from The Nature Conservancy for his help in identifying the green-  
211 yellow morph and Benjamin Giffin for his help with sequencing analysis. We would also like to  
212 thank Kurt Thompson, Doug Haywick, and Brayden Partridge for assisting with the figure  
213 construction.

## 214 215 **References**

216  
217 Abdel-Aal, E.S.M., Young, J.C., and Rabalski, I. 2006. Anthocyanin composition in black, blue,  
218 pink, purple, and red cereal grains. *J. Agric. Food Chem.* **54**(13): 4696-4704.  
219

- 220 Asen, S., Stewart, R.N., and Norris, K.H. 1972. Co-pigmentation of anthocyanins in plant  
221 tissues and its effect on color. *Phytochemistry* **11**(3): 1139-1144.  
222
- 223 Bevill, R.L., Louda, S.M., and Stanforth, L.M. 1999. Protection from Natural Enemies in  
224 managing rare plant species. *Conserv. Biol.* **13**(6): 1323-1331.
- 225 Chen, S., Yao, H., Han, J., Liu, C., Song, J., Shi, L., Zhu, Y., Ma, X., Gao, T., Pang, X., Luo, K., Li, X.,  
226 Jai, X., Lin, Y., and Leon, C. 2010. Validation of the ITS2 region as a novel DNA  
227 barcode for identifying medicinal plant species. *PloS One* **5**(1): e8613. doi:  
228 10.1371/journal.pone.0008613L
- 229 Clement, M., Posada, D., and Crandall, K.A. 2000. TCS: a computer program to estimate gene  
230 genealogies. *Mol. Ecol.* **9**: 1657-1659.  
231
- 232 de Pascual-Teresa, S., Santos-Buelga, C., and Rivas-Gonzalo, J.C. 2002. LC-MS analysis of  
233 anthocyanins from purple corn cob. *J. Sci. Food Agric.* **82**(9): 1003-1006.  
234
- 235 Darwent, A.L., and Coupland, R.T. 1966. Life history of *Gypsophila paniculata*. *Weeds* **14**(4):  
236 313-318.  
237
- 238 Department of Natural Resources (DNR). 2015. Michigan Invasive Species Grant Program  
239 Handbook. [http://www.michigan.gov/documents/dnr/2015-MISGP-](http://www.michigan.gov/documents/dnr/2015-MISGP-hndbk_491809_7.pdf?source=govdelivery)  
240 [hndbk\\_491809\\_7.pdf?source=govdelivery](http://www.michigan.gov/documents/dnr/2015-MISGP-hndbk_491809_7.pdf?source=govdelivery)  
241
- 242 Edgar, R.C. 2004. MUSCLE: multiple sequence alignment with high accuracy and high  
243 throughput. *Nucleic Acids Res.* **32**(5): 1792-1797.  
244
- 245 Emery, S.M., Doran, P.J., Legge, J.T., Kleitch, M., and Howard, S. 2013. Aboveground and  
246 belowground impacts following removal of the invasive species baby's breath  
247 (*Gypsophila paniculata*) on Lake Michigan sand dunes. *Restoration Ecol.* **21**(4): 506-  
248 514.  
249
- 250 Fior, S., Karis, P. O., Casazza, G., Minuto, L., and Sala, F. 2006. Molecular phylogeny of the  
251 Caryophyllaceae (Caryophyllales) inferred from chloroplast matK and nuclear rDNA  
252 ITS sequences. *Am. J. Bot.* **93**(3): 399-411.  
253
- 254 Jukes, T.H. and Cantor, C.R. 1969. Evolution of protein molecules. *In* *Mammalian Protein*  
255 *Metabolism*. Edited by H. N. Munro. Academic Press, New York. pp. 21-132  
256
- 257 Karamanski, T.J. 2000. Nationalized Lakeshore: The Creation and Administration of  
258 Sleeping Bear Dunes National Lakeshore. Online Book. National Park Service,  
259 Department of the Interior. [http://www.cr.nps.gov/history/online\\_books/slbe/](http://www.cr.nps.gov/history/online_books/slbe/)  
260
- 261 Kumar, S., Stecher, G., & Tamura, K. 2016. MEGA7: Molecular Evolutionary Genetics  
262 Analysis version 7.0 for bigger datasets. *Mol. Biol. Evol.* **33**(7): 1870-1874.  
263

- 264 Lee, S. C., Wang, C. H., Yen, C. E., and Chang, C. 2017. DNA barcode and identification of the  
265 varieties and provenances of Taiwan's domestic and imported made teas using  
266 ribosomal internal transcribed spacer 2 sequences. *J. Food Drug Anal.* **25**(2): 260-  
267 274. doi: 10.1016/j.jfda.2016.06.008  
268
- 269 Leege, L. M., Murphy, P. G. 2001. Ecological effects of the non-native *Pinus nigra* on sand  
270 dune communities. *Can. J. Bot.* **79**(4): 429-437.  
271
- 272 Stevens, O. A. 1957. Weights of seeds and numbers per plant. *Weeds* **5**: 46-55.  
273
- 274 Tamura K. 1992. Estimation of the number of nucleotide substitutions when there are  
275 strong transition-transversion and G + C-content biases. *Mol. Biol. Evol.* **9**(4): 678-  
276 687.  
277
- 278 Templeton, A. R., Crandall, K. A., Sing, C. F. 1992. A cladistics analysis of phenotypic  
279 association with haplotypes inferred from restriction endonuclease mapping and  
280 DNA sequence data. III. Cladogram estimation. *Genetics.* **132**: 619-633.  
281
- 282 The Nature Conservancy (TNC). 2014. Lake Michigan Coastal Dunes Restoration Project.  
283 2013 Field Season Report. The Nature Conservancy and Partners, Lansing, Michigan  
284  
285  
286  
287

## 288 **Figure Legends**

289  
290 Figure 1: (A) Green-yellow morph, (B) common purple morph and (C) Stem of the green-  
291 yellow and purple baby's breath morph found in Sleeping Bear Dunes National Lakeshore.  
292

293 Figure 2: Phylogenetic construction of the purple and green-yellow baby's breath color  
294 morphs in relationship to *G. paniculata* and *G. elegans* reference sequences. All  
295 evolutionary histories were inferred using maximum likelihood methods. (A) Phylogeny  
296 based on RbcL, MatK, and ITS2 combined, (B) phylogeny based on the RbcL region, (C)  
297 phylogeny based on the MatK region, (D) phylogeny based on the ITS2 region. For RbcL and  
298 ITS2 we used a Jukes Cantor model of molecular evolution (Jukes and Cantor, 1969). For  
299 MatK and the combined data set we used a Tamura 3-parameter model of molecular  
300 evolution (Tamura 1992).  
301

302 Figure 3: A TCS haplotype network based on RbcL, MatK and ITS2 combined for the purple  
303 and green-yellow baby's breath color morphs, *G. paniculata* reference, and *G. elegans*  
304 references. The haplotypes with the highest outgroup probabilities are displayed as  
305 squares and the size of the square or oval corresponds to their haplotype frequency. The  
306 empty dots represent missing intermediate haplotypes. GY = Green-Yellow.  
307  
308

309  
310  
311

Figure 1

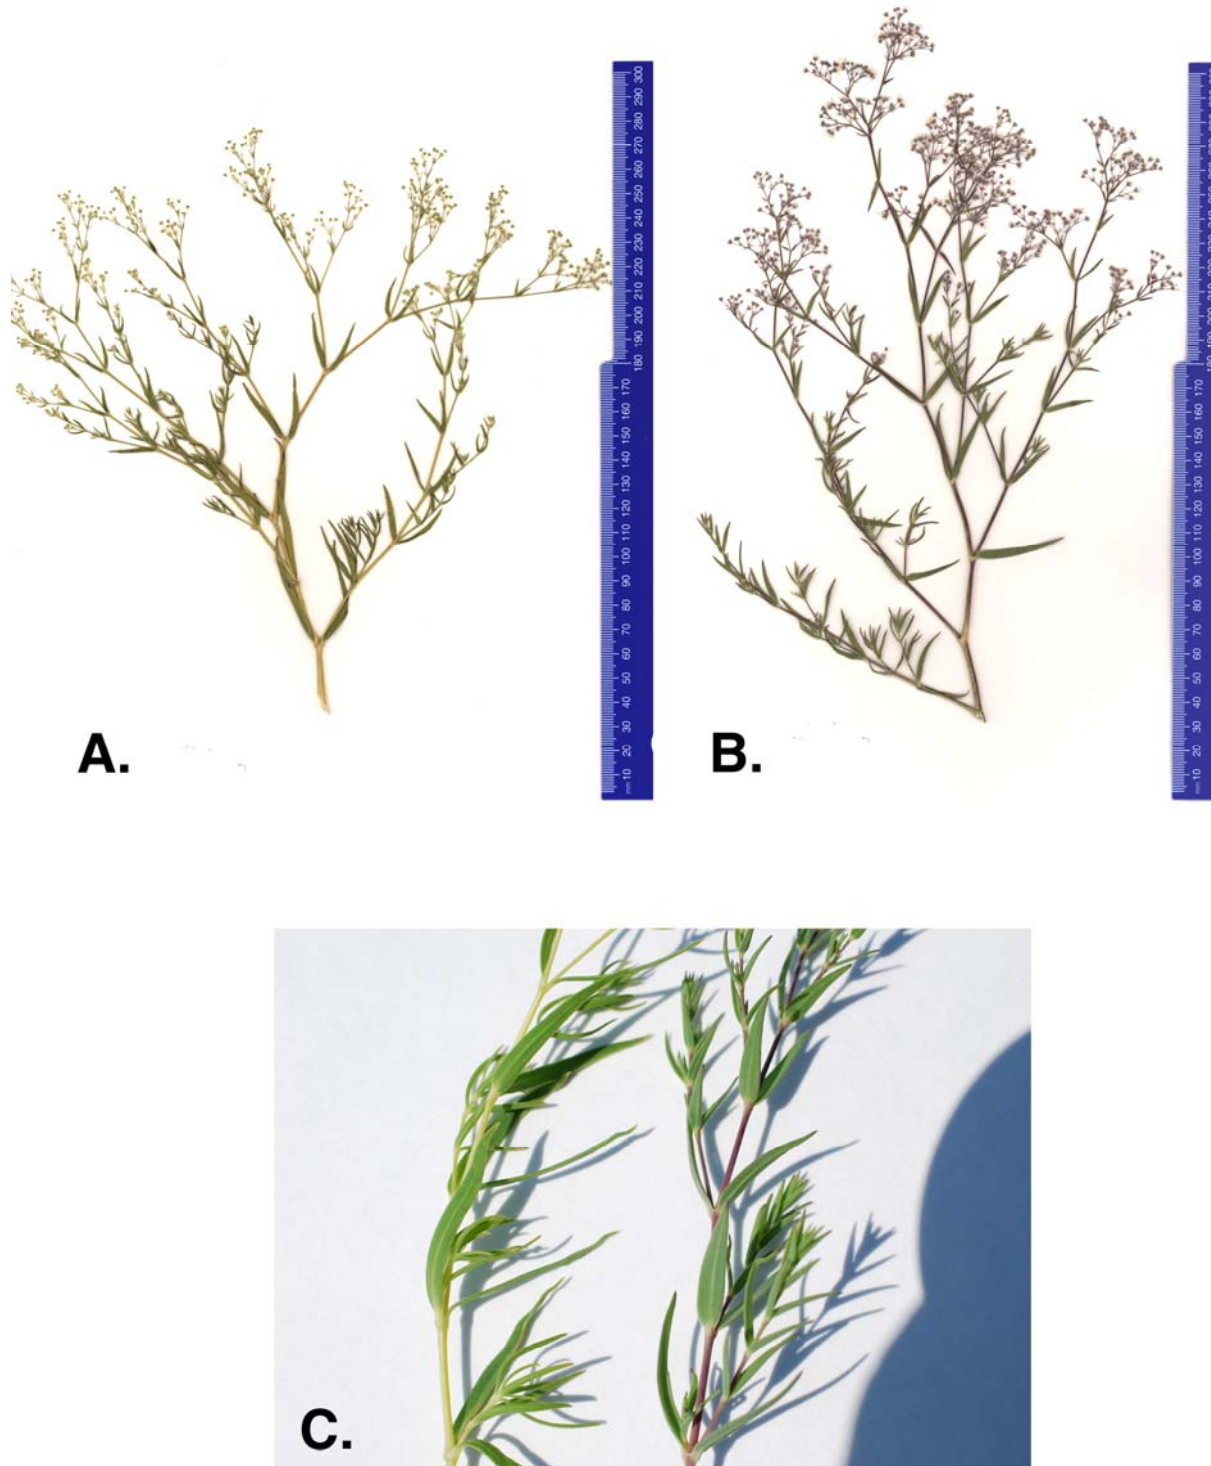

312

313  
314

Figure 2

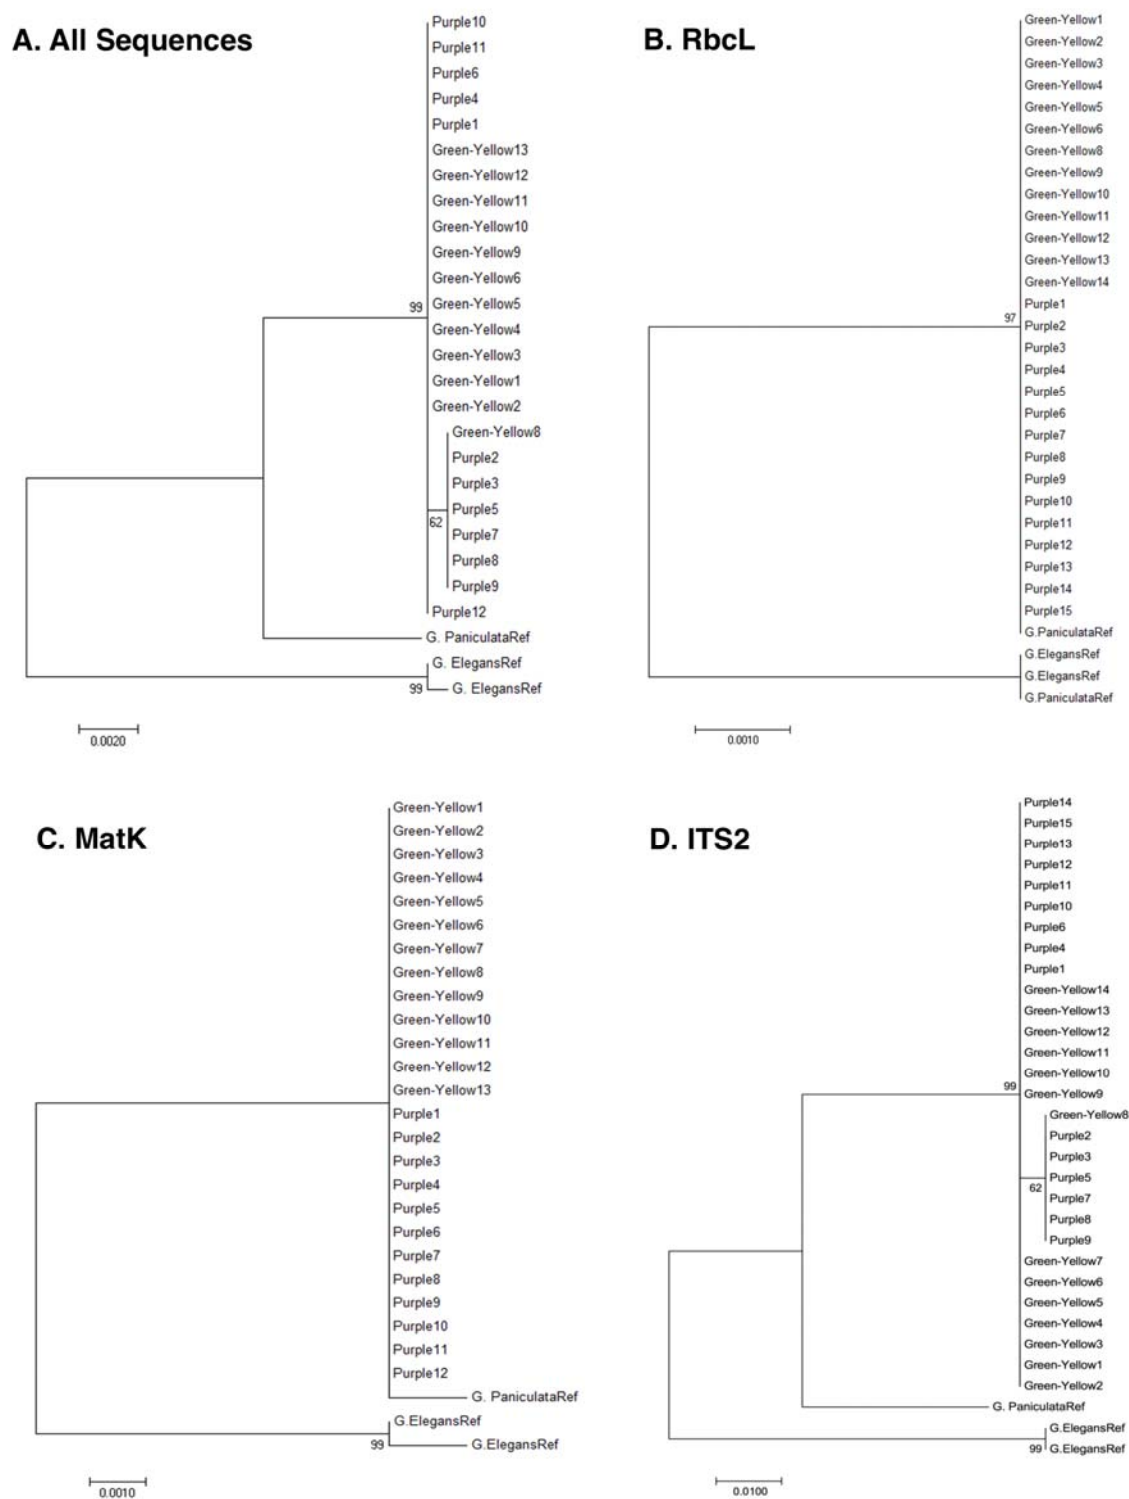

315  
316  
317

318  
319

Figure 3

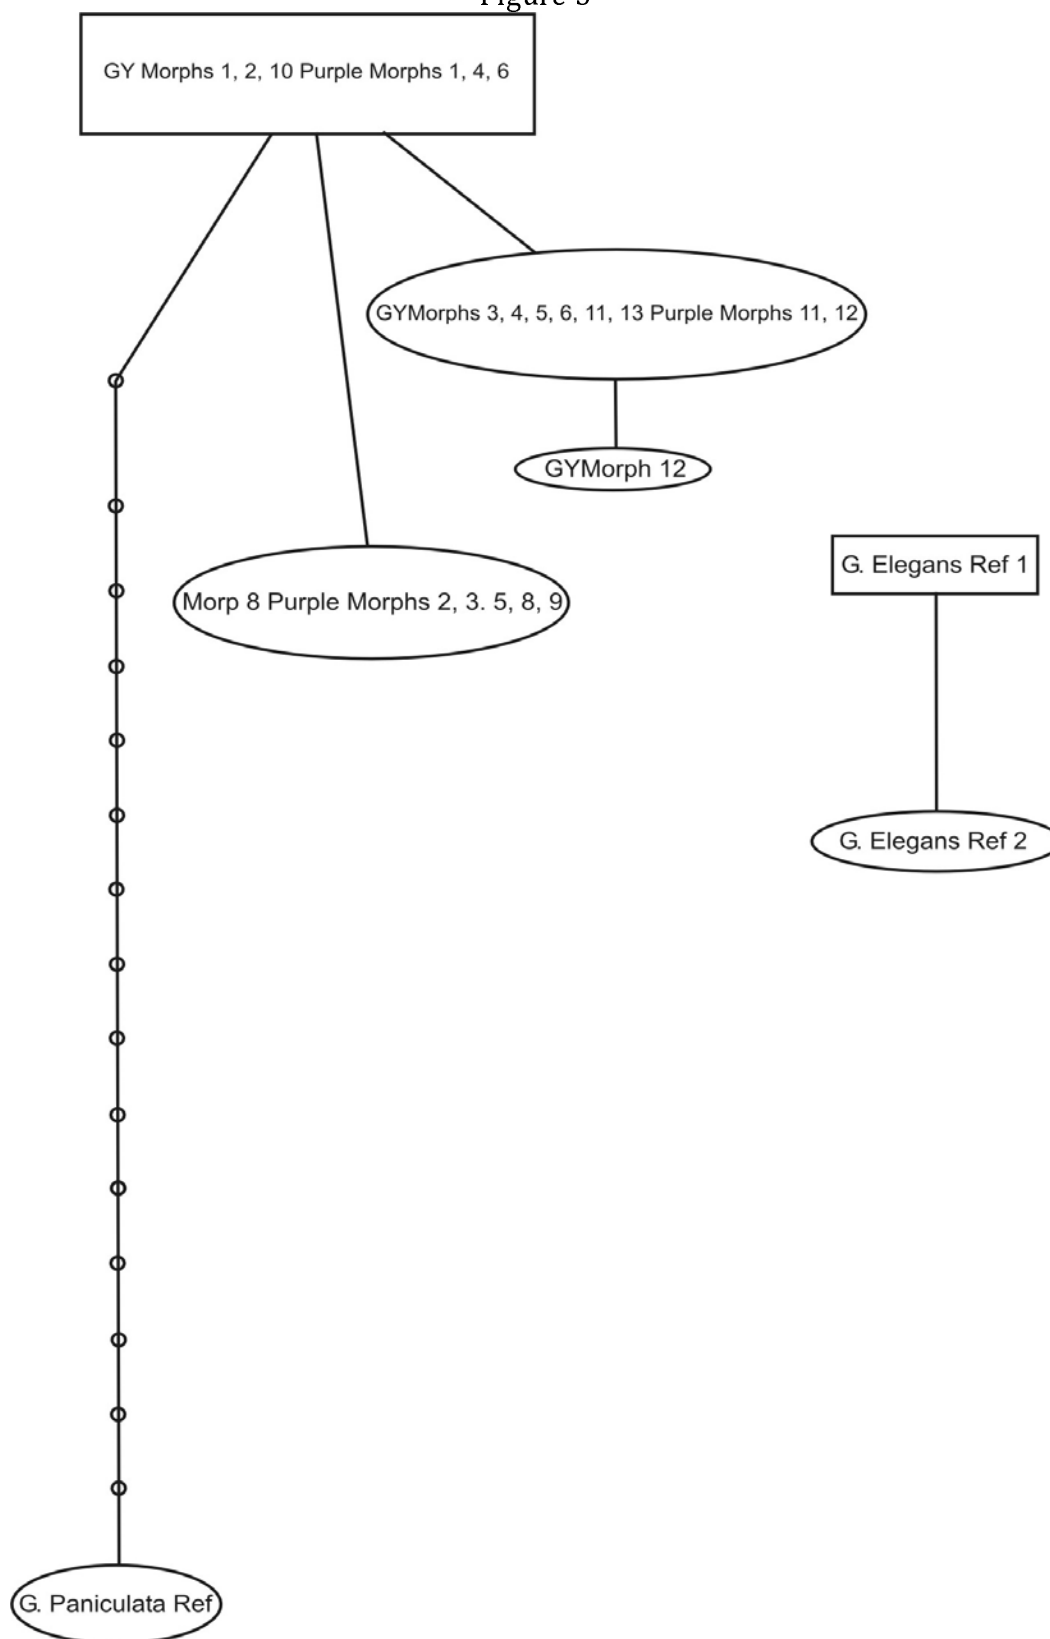

320
